# Supplementary material for: Commercially Available Cell-Free Permeability Tests for Industrial Drug Development: Increased Sustainability through Reduction of In Vivo Studies
Source: MDPI journal article supplement (doi:10.3390/pharmaceutics15020592), 2023-02-09
Supplement: s1 [file s1]

## Supplementary Material

Product overview of the 10 largest pharmaceutical companies:

BCS classification:

BCS1: high solubility, high permeability

BCS2: low solubility, high permeability

BCS3: high solubility, low permeability

BCS4: low solubility, low permeability

BCS0: No information on BCS class available or solubility/permeability data inconclusive

**Pfizer products (<https://www.pfizer.com/products>):**

1. [ACCUPRIL®](#) Oral BCS1 1991 90s1

(quinapril HCl)

[https://www.accessdata.fda.gov/drugsatfda\\_docs/label/2009/019885s0281bl.pdf](https://www.accessdata.fda.gov/drugsatfda_docs/label/2009/019885s0281bl.pdf)

2. [ACCURETIC®](#) Oral BCS0 1999 90s0

(quinapril HCl/hydrochlorothiazide)

[https://www.accessdata.fda.gov/drugsatfda\\_docs/label/2009/019885s0281bl.pdf](https://www.accessdata.fda.gov/drugsatfda_docs/label/2009/019885s0281bl.pdf)

3. [ACETYLCYSTEINE](#)

(acetylcysteine solution)

4. [ADENOSINE](#)

(adenosine)

5. [ALDACTAZIDE®](#) Oral BCS2 1978 70s2

(spironolactone and hydrochlorothiazide)

[https://www.accessdata.fda.gov/drugsatfda\\_docs/label/2008/012151s0621bl.pdf](https://www.accessdata.fda.gov/drugsatfda_docs/label/2008/012151s0621bl.pdf)

6. [ALDACTONE®](#) Oral BCS2 1960 60s2

(spironolactone)

[https://www.accessdata.fda.gov/drugsatfda\\_docs/label/2008/012151s0621bl.pdf](https://www.accessdata.fda.gov/drugsatfda_docs/label/2008/012151s0621bl.pdf)

7. [ALFENTANIL INJECTION](#)
8. [ALTACE®](#) Oral BCS0                      1991                      90s0  
 (ramipril)
9. [AMIDATE™](#)  
 (etomidate)
10. [AMINOCAPROIC ACID](#)
11. [AMINOPHYLLINE](#)  
 (aminophylline)
12. [AMIODARONE HYDROCHLORIDE](#) Oral BCS0                      1985                      80s0
13. [AMMONIUM CHLORIDE](#)
14. [AMPICILLIN AND SULBACTAM](#)
15. [AMPICILLIN FOR INJECTION](#)  
 Ampicillin Sodium
16. [ARGATROBAN](#)  
 (argatroban injection, solution)
17. [AROMASIN®](#) Oral BCS4                      1999                      90s4  
 (exemestane)  
[https://www.accessdata.fda.gov/drugsatfda\\_docs/label/1999/20753LBL.PDF](https://www.accessdata.fda.gov/drugsatfda_docs/label/1999/20753LBL.PDF)
18. [ARTHROTEC®](#) Oral BCS2                      1997                      90s2  
 (diclofenac sodium/misoprostol)  
[https://www.ema.europa.eu/en/documents/referral/diclofenac-article-29-referral-assessment-report\\_en.pdf](https://www.ema.europa.eu/en/documents/referral/diclofenac-article-29-referral-assessment-report_en.pdf)  
[https://www.ema.europa.eu/en/documents/outside-eu-assessment-report/hemoprostol-public-assessment-report\\_en.pdf](https://www.ema.europa.eu/en/documents/outside-eu-assessment-report/hemoprostol-public-assessment-report_en.pdf)
19. [ATGAM®](#)  
 (lymphocyte immune globulin, anti-thymocyte globulin [equine] sterile solution)
20. [ATRACURIUM BESYLATE](#)  
 (atracurium besylate)

21. [ATROPINE SULFATE](#)

22. [AZITHROMYCIN](#)

23. [AZTREONAM](#)

(aztreonam)

24. [AZULFIDINE®](#) Oral BCS2 BCS4 1950 50s4

(sulfasalazine, USP)

[https://www.pfizer.ca/sites/default/files/202011/Salazopyrin\\_PM\\_E\\_19Oct2020\\_239257.pdf](https://www.pfizer.ca/sites/default/files/202011/Salazopyrin_PM_E_19Oct2020_239257.pdf)

25. [BAVENCIO](#)

(avelumab)

26. [BENEFIX®](#)

(coagulation factor IX (recombinant))

27. [BESPONSA™ for injection](#)

(inotuzumab ozogamicin)

28. [BICILLIN® C-R](#)

(penicillin G benzathine and penicillin G procaine injectable suspension)

29. [BICILLIN® L-A](#)

(penicillin G benzathine)

30. [BIVALIRUDIN](#)

(bivalirudin)

31. [BLEOMYCIN](#)

32. [BORTEZOMIB](#)

(bortezomib)

33. [BOSULIF®](#) Oral BCS4 2012-4 10s4

(bosutinib)

[https://www.accessdata.fda.gov/drugsatfda\\_docs/nda/2012/203341orig1s000clinpharmr.pdf](https://www.accessdata.fda.gov/drugsatfda_docs/nda/2012/203341orig1s000clinpharmr.pdf)

34. [BRAFTOVI® capsules](#) Oral BCS2 2018-2 10s2  
(encorafenib)  
[https://www.ema.europa.eu/en/documents/assessment-report/braftovi-epar-public-assessment-report\\_en.pdf](https://www.ema.europa.eu/en/documents/assessment-report/braftovi-epar-public-assessment-report_en.pdf)
35. [BUMETANIDE](#)  
(bumetanide)
36. [BUPIVACAINE](#)  
(bupivacaine hydrochloride)
37. [BUPRENORPHINE HYDROCHLORIDE](#)  
(buprenorphine hydrochloride)
38. [BUSULFAN](#)  
(busulfan)
39. [BUTORPHANOL TARTRATE](#)  
(butorphanol tartrate)
40. [CADUET®](#) Oral BCS2 2004-2 00s2  
(amlodipine besylate/[atorvastatin](#) calcium)  
[https://www.accessdata.fda.gov/drugsatfda\\_docs/nda/2018/210045Orig1s000ChemR.pdf](https://www.accessdata.fda.gov/drugsatfda_docs/nda/2018/210045Orig1s000ChemR.pdf)  
[https://www.accessdata.fda.gov/drugsatfda\\_docs/label/2009/020702s0571bl.pdf](https://www.accessdata.fda.gov/drugsatfda_docs/label/2009/020702s0571bl.pdf)
41. [CALAN®](#) Oral BCS1 1984 80s1  
(verapamil hydrochloride)  
[https://www.accessdata.fda.gov/drugsatfda\\_docs/label/2016/018925s0101bl.pdf](https://www.accessdata.fda.gov/drugsatfda_docs/label/2016/018925s0101bl.pdf)
42. [CALCIUM CHLORIDE](#)  
(calcium chloride)
43. [CAMPTOSAR®](#)  
(irinotecan HCl injection)

44. [CARBOCAINE](#)  
(mepivacaine)
45. [CARBOPLATIN](#)  
(carboplatin)
46. [CARDURA®](#) Oral BCS0 1990 90s0  
(doxazosin mesylate)
47. [CARDURA® XL](#) Oral BCS0 1990 90s0  
(doxazosin mesylate extended release)
48. [CAVERJECT®](#)  
(alprostadil injection, powder, lyophilized, for solution)
49. [CEFAZOLIN](#)  
(cefazolin)
50. [CEFEPIME](#)  
(Cefepime)
51. [CEFOBID](#)  
(cefoperazone sodium)
52. [CEFTRIAZONE](#)  
(ceftriaxone)
53. [CELEBREX](#) Oral BCS2 1998 90s2  
(celecoxib capsules)  
  
[https://www.ema.europa.eu/en/documents/scientific-discussion/onsenal-epar-scientific-discussion\\_en.pdf](https://www.ema.europa.eu/en/documents/scientific-discussion/onsenal-epar-scientific-discussion_en.pdf)
54. [CELONTIN®](#) Oral BCS0 1957 50s0  
(methsuximide capsules)
55. [CEREBYX®](#)

- (fosphenytoin sodium injection)
56. [CHANTIX®](#) Oral BCS1 2006-1 00s1  
(varenicline)  
[https://www.accessdata.fda.gov/drugsatfda\\_docs/nda/2006/021928\\_s000\\_Chantix\\_ChemR.pdf](https://www.accessdata.fda.gov/drugsatfda_docs/nda/2006/021928_s000_Chantix_ChemR.pdf)
57. [CHROMIUM](#)  
(chromic chloride)
58. [CIBINQO™](#) Oral BCS2 2022-2 20s2  
(abrocitinib)  
[https://www.ema.europa.eu/en/documents/assessment-report/cibingo-epar-public-assessment-report\\_en.pdf](https://www.ema.europa.eu/en/documents/assessment-report/cibingo-epar-public-assessment-report_en.pdf)
59. [CIPROFLOXACIN](#)  
(ciprofloxacin)
60. [CISATRACURIUM BESYLATE](#)  
(cisatracurium besylate)
61. [CLEOCIN](#)  
(clindamycin)
62. [COLESTID®](#)  
(micronized colestipol hydrochloride)
63. [COMIRNATY®](#)  
(COVID-19 Vaccine, mRNA)
64. [COPPER](#)  
(cupric chloride)
65. [CORLOPAM®](#)

- (fenoldopam mesylate)
66. [CORTEF®](#) Oral BCS2 1952 50s2  
(hydrocortisone tablets)  
[https://ec.europa.eu/health/documents/community-register/2011/20111103110069/anx\\_110069\\_en.pdf](https://ec.europa.eu/health/documents/community-register/2011/20111103110069/anx_110069_en.pdf)
67. [CORTISPORIN®](#)  
(neomycin and polymyxin B sulfates, and hydrocortisone acetate)
68. [CORVERT®](#)  
(ibutilide fumarate injection)
69. [CORZIDE®](#) Oral BCS0  
(nadolol and bendroflumethiazide)
70. [COVERA-HS®](#) Oral BCS1 1984 80s1  
(verapamil hydrochloride extended-release)  
[https://www.accessdata.fda.gov/drugsatfda\\_docs/label/2016/018925s010lbl.pdf](https://www.accessdata.fda.gov/drugsatfda_docs/label/2016/018925s010lbl.pdf)
71. [CUTAQUIG®](#)  
(Immune Globulin Subcutaneous (Human) - hipp), 16.5% solution
72. [CYKLOKAPRON®](#)  
(tranexamic acid injection)
73. [CYTARABINE](#)  
(cytarabine)
74. [CYTOMEL®](#) Oral BCS0 1956 50s0  
(liothyronine sodium)
75. [CYTOTEC®](#) Oral BCS1 1988 80s1  
(misoprostol)

[https://www.ema.europa.eu/en/documents/outside-eu-assessment-report/hemoprostol-public-assessment-report\\_en.pdf](https://www.ema.europa.eu/en/documents/outside-eu-assessment-report/hemoprostol-public-assessment-report_en.pdf)

76. [DACARBAZINE](#)

(dacarbazine)

77. [DAPTOMYCIN](#)

(daptomycin)

78. [DAURISMO Tablets](#) Oral BCS4 2018-4 10s4

(glasdegib)

[https://www.ema.europa.eu/en/documents/assessment-report/daurismo-epar-public-assessment-report\\_en.pdf](https://www.ema.europa.eu/en/documents/assessment-report/daurismo-epar-public-assessment-report_en.pdf)

79. [DAYPRO ALTA™](#) Oral BCS2 1992 90s2

(oxaprozin potassium)

[https://www.accessdata.fda.gov/drugsatfda\\_docs/label/2007/18841s022lbl.pdf](https://www.accessdata.fda.gov/drugsatfda_docs/label/2007/18841s022lbl.pdf)

80. [DAYPRO®](#) Oral BCS2 1992 90s2

(oxaprozin)

[https://www.accessdata.fda.gov/drugsatfda\\_docs/label/2007/18841s022lbl.pdf](https://www.accessdata.fda.gov/drugsatfda_docs/label/2007/18841s022lbl.pdf)

81. [DEFEROXAMINE MESYLATE](#)

(deferoxamine mesylate)

82. [DEMEROL™](#)

(meperidine hydrochloride)

83. [DEPO-MEDROL®](#)

(methylprednisolone acetate injectable suspension)

84. [DEPO-PROVERA](#)

(medroxyprogesterone acetate injectable suspension)

85. [DEPO-SUBQ PROVERA 104®](#)



- (medroxyprogesterone acetate injectable suspension)
86. [DEPO®-ESTRADIOL](#)  
(estradiol cypionate injection)
87. [DEPO®-TESTOSTERONE](#)  
(testosterone cypionate injection)
88. [DETROL®](#) Oral BCS1            1998            90s1  
(tolterodine tartrate)  
[https://www.accessdata.fda.gov/drugsatfda\\_docs/label/2009/020771s0221bl.pdf](https://www.accessdata.fda.gov/drugsatfda_docs/label/2009/020771s0221bl.pdf)
89. [DEXTROSE](#)  
(dextrose)
90. [DIABINESE®](#) Oral BCS2            1998            90s2  
(chlorpropamide)  
[https://www.accessdata.fda.gov/drugsatfda\\_docs/label/2008/011641s0641bl.pdf](https://www.accessdata.fda.gov/drugsatfda_docs/label/2008/011641s0641bl.pdf)
91. [DIAZEPAM](#)  
(diazepam)
92. [DIDREX](#) Oral BCS1            1960            60s1  
(benzphetamine hydrochloride)  
[https://www.accessdata.fda.gov/drugsatfda\\_docs/label/2010/012427s0261bl.pdf](https://www.accessdata.fda.gov/drugsatfda_docs/label/2010/012427s0261bl.pdf)
93. [DIFLUCAN®](#) Oral BCS0            1988            80s0  
(fluconazole)
94. [DILANTIN®](#) Oral BCS2            1953            50s2  
(phenytoin oral suspension, phenytoin, and extended phenytoin sodium)  
[https://www.accessdata.fda.gov/drugsatfda\\_docs/label/2016/008762s057s0581bl.pdf](https://www.accessdata.fda.gov/drugsatfda_docs/label/2016/008762s057s0581bl.pdf)

95. [DILTIAZEM HYDROCHLORIDE](#)  
(diltiazem hydrochloride)
96. [DOBUTAMINE](#)  
(dobutamine)
97. [DOCETAXEL INJECTION](#)
98. [DOPAMINE](#)  
(dopamine)
99. [DOSTINEX®](#) Oral BCS2 BCS4                      1996                      90s4  
(cabergoline)  
[https://www.accessdata.fda.gov/drugsatfda\\_docs/label/2014/020664s0131bl.pdf](https://www.accessdata.fda.gov/drugsatfda_docs/label/2014/020664s0131bl.pdf)
100. [DOXERCALCIFEROL](#)  
(doxercalciferol)
101. [DOXORUBICIN HYDROCHLORIDE](#)  
(doxorubicin hydrochloride)
102. [DROPERIDOL](#)  
(droperidol)
103. [DUAVEE®](#) Oral BCS0  
(conjugated estrogens/bazedoxifene)
104. [EFFEXOR® XR](#) Oral BCS1                      1997                      90s1  
(venlafaxine hydrochloride)  
[https://www.accessdata.fda.gov/drugsatfda\\_docs/label/2005/020699s0591bl.pdf](https://www.accessdata.fda.gov/drugsatfda_docs/label/2005/020699s0591bl.pdf)
105. [ELELYSO™](#)  
(taliglucerase alfa)
106. [ELIQUIS](#) Oral BCS3                      2012-3                      10s3  
(apixaban)

[https://www.ema.europa.eu/en/documents/scientific-guideline/apixaban-film-coated-tablet-25-5-mg-product-specific-bioequivalence-guidance\\_en.pdf](https://www.ema.europa.eu/en/documents/scientific-guideline/apixaban-film-coated-tablet-25-5-mg-product-specific-bioequivalence-guidance_en.pdf)

107. [ELLENCÉ®](#)

(epirubicin hydrochloride)

108. [EMCYT®](#) Oral BCS1 BCS3 1981 80s1

(estramustine phosphate sodium)

[https://cdn.pfizer.com/pfizercom/products/uspi\\_emcyt.pdf](https://cdn.pfizer.com/pfizercom/products/uspi_emcyt.pdf)

109. [ENALAPRILAT](#)

(enalaprilat)

110. [EPINEPHRINE](#)

(epinephrine)

111. [ERAXIS™](#)

(anidulafungin)

112. [Ertapenem](#)

(Ertapenem)

113. [ERYTHROCIN™ LACTOBIONATE](#)

(erythromycin lactobionate)

114. [ESTRING®](#)

(estradiol vaginal ring)

115. [EUCRISA™](#)

(crisaborole)

116. [FELDENE®](#) Oral BCS2 1982 80s2

(piroxicam)

[https://www.accessdata.fda.gov/drugsatfda\\_docs/label/2006/018147s0291bl.pdf](https://www.accessdata.fda.gov/drugsatfda_docs/label/2006/018147s0291bl.pdf)

117. [FENTANYL CITRATE](#)

- (fentanyl citrate)
118. [FLAGYL®](#) Oral BCS0  
(metronidazole)
119. [FLUCONAZOLE](#)  
(fluconazole)
120. [FOSCAVIR®](#)  
(foscarnet sodium)
121. [FRAGMIN®](#)  
(dalteparin sodium injection)
122. [FUROSEMIDE](#)  
(furosemide)
123. [GELFILM®](#)  
(gelfilm absorbable film)
124. [GELFOAM® and GEL-FLOW NT](#)  
(absorbable gelatin)
125. [GEMCITABINE](#)  
(gemcitabine)
126. [GENOTROPIN](#)  
(somatropin [rDNA origin])
127. [GENTAMICIN SULFATE](#)  
(gentamicin sulfate)
128. [GEODON](#) Oral BCS4                      2001                      00s4  
(ziprasidone HCl)

[https://www.accessdata.fda.gov/drugsatfda\\_docs/nda/2002/20-919\\_Geodon\\_biopharmr.pdf](https://www.accessdata.fda.gov/drugsatfda_docs/nda/2002/20-919_Geodon_biopharmr.pdf)

129. [GLUCOTROL®](#) Oral BCS2 1994 90s2  
(glipizide)  
[https://www.accessdata.fda.gov/drugsatfda\\_docs/label/2008/017783s0191bl.pdf](https://www.accessdata.fda.gov/drugsatfda_docs/label/2008/017783s0191bl.pdf)
130. [GLYNASE® PRESTAB®](#) Oral BCS0  
(micronized glyburide)
131. [GLYSET®](#) Oral BCS1 1999 90s1  
(miglitol)  
[https://www.accessdata.fda.gov/drugsatfda\\_docs/label/2012/020682s0101bl.pdf](https://www.accessdata.fda.gov/drugsatfda_docs/label/2012/020682s0101bl.pdf)
132. [HALCION®](#) Oral BCS2 1982 80s2  
(triazolam)  
[https://www.accessdata.fda.gov/drugsatfda\\_docs/label/2019/017892s0501bl.pdf](https://www.accessdata.fda.gov/drugsatfda_docs/label/2019/017892s0501bl.pdf)
133. [HEMABATE®](#)  
(carboprost tromethamine)
134. [HEPARIN SODIUM INJECTION](#)  
(heparin sodium)
135. [HETASTARCH](#)  
(hetastarch)
136. [HEXTEND](#)  
(hetastarch)
137. [HUMATIN](#)  
(paromomycin sulfate)
138. [HYDROMORPHONE HYDROCHLORIDE](#)  
(hydromorphone hydrochloride)
139. [IBRANCE®](#) Oral BCS2 2015-2 10s2

(palbociclib)

[https://www.ema.europa.eu/en/documents/scientific-guideline/draft-palbociclib-hard-capsule-75-mg-100-mg-125-mg-product-specific-bioequivalence-guidance\\_en-0.pdf](https://www.ema.europa.eu/en/documents/scientific-guideline/draft-palbociclib-hard-capsule-75-mg-100-mg-125-mg-product-specific-bioequivalence-guidance_en-0.pdf)

140. [IDAMYCIN®](#)

(idarubicin hydrochloride)

141. [INDOMETHACIN](#)

(indomethacin)

142. [INFLECTRA®](#)

(infliximab-dyyb)

143. [INLYTA®](#) Oral BCS2                      2012-2                      10s2

(axitinib)

[https://www.accessdata.fda.gov/drugsatfda\\_docs/nda/2012/202324orig1s000clinpharmr.pdf](https://www.accessdata.fda.gov/drugsatfda_docs/nda/2012/202324orig1s000clinpharmr.pdf)

144. [INSPRA](#) Oral BCS4                      2002-4                      00s4

(eplerenone)

[https://www.accessdata.fda.gov/drugsatfda\\_docs/label/2016/021437s013lbl.pdf](https://www.accessdata.fda.gov/drugsatfda_docs/label/2016/021437s013lbl.pdf)

145. [INTAL® Nebulizer](#)

(cromolyn sodium)

146. [IRINOTECAN HYDROCHLORIDE](#)

(irinotecan hydrochloride)

147. [IXIFI™ for injection, for Intravenous Use](#)

(infliximab-qbtx)

148. [KERYDIN®](#)

(tavaborole)

149. [KETAMINE HYDROCHLORIDE](#)

(ketamine hydrochloride)

150. [KETOROLAC TROMETHAMINE](#)

(ketorolac tromethamine)

151. [LABETALOL HYDROCHLORIDE](#)

(labetalol hydrochloride)

152. [LEVETIRACETAM](#)

(levetiracetam)

153. [LEVOFLOXACIN](#)

(levofloxacin)

154. [LEVOPHED](#)

(norepinephrine)

155. [LEVOXYL®](#) Oral BCS0

(levothyroxine sodium)

156. [LIDOCAINE HYDROCHLORIDE](#)

(lidocaine hydrochloride)

157. [LINCOCIN®](#)

(lincomycin)

158. [LINEZOLID](#)

(linezolid)

159. [LIPITOR®](#) Oral BCS4      1996      90s4

(atorvastatin calcium)

[https://www.accessdata.fda.gov/drugsatfda\\_docs/label/2009/020702s0571bl.pdf](https://www.accessdata.fda.gov/drugsatfda_docs/label/2009/020702s0571bl.pdf)

160. [LO/OVRAL®](#) Oral BCS0      1979      70s0

(norgestrel and ethinyl estradiol)

161. [Lomotil®](#) Oral BCS0

- (diphenoxylate hydrochloride with atropine sulfate)
162. [LONITEN®](#) Oral BCS0 1979 70s0  
(minoxidil tablets)
163. [LOPID®](#) Oral BCS2 1982 80s2  
(gemfibrozil)  
[https://www.accessdata.fda.gov/drugsatfda\\_docs/label/2016/018422s0551bl.pdf](https://www.accessdata.fda.gov/drugsatfda_docs/label/2016/018422s0551bl.pdf)
164. [LORAZEPAM](#)  
(lorazepam)
165. [LORBRENA®](#) Oral BCS4 2018-4 10s4  
(lorlatinib)  
[https://www.accessdata.fda.gov/drugsatfda\\_docs/nda/2018/210868Orig1s000ChemR.pdf](https://www.accessdata.fda.gov/drugsatfda_docs/nda/2018/210868Orig1s000ChemR.pdf)
166. [LOW MOLECULAR WEIGHT DEXTRAN](#)  
(dextran 40)
167. [LYRICA® and LYRICA®CR](#) Oral BCS1 2004-1 00s1  
(pregabalin) and (pregabalin extended release tablets)  
[https://www.ema.europa.eu/en/documents/assessment-report/pregabalin-zentiva-epar-public-assessment-report\\_en.pdf](https://www.ema.europa.eu/en/documents/assessment-report/pregabalin-zentiva-epar-public-assessment-report_en.pdf)
168. [MAGNESIUM SULFATE](#)  
(magnesium sulfate)
169. [MANGANESE CHLORIDE](#)  
(manganese chloride)
170. [MANNITOL](#)  
(mannitol)
171. [MARCAINE](#)  
(bupivacaine hydrochloride)



172. [MAXIPIME](#)  
(cefepime hydrochloride)
173. [MEDROL®](#) Oral BCS2      1957      50s2  
(methylprednisolone)  
[https://www.accessdata.fda.gov/drugsatfda\\_docs/label/2018/011153s075lbl.pdf](https://www.accessdata.fda.gov/drugsatfda_docs/label/2018/011153s075lbl.pdf)
174. [MEKTOVI® tablets](#) Oral BCS4      2018-4      10s4  
(binimetinib)  
[https://www.accessdata.fda.gov/drugsatfda\\_docs/label/2018/210498lbl.pdf](https://www.accessdata.fda.gov/drugsatfda_docs/label/2018/210498lbl.pdf)
175. [MENEST®](#) Oral BCS0  
(esterified estrogens)
176. [MEPIVACAINE](#)  
(mepivacaine)
177. [MEROPENEM](#)  
(Meropenem)
178. [MERREM® I.V.](#)  
(meropenem for injection)
179. [METHOTREXATE](#)  
(methotrexate)
180. [METOCLOPRAMIDE HYDROCHLORIDE](#)  
(metoclopramide)
181. [METOPROLOL](#)  
(metoprolol)
182. [METRONIDAZOLE](#)  
(metronidazole)

183. [MICRONASE®](#) Oral BCS0 1984 80s0  
(glyburide)
184. [MIDAZOLAM](#)  
(midazolam)
185. [MILRINONE LACTATE](#)  
(milrinone lactate)
186. [MINIPRESS®](#) Oral BCS0 1988 80s0  
(prazosin hydrochloride)
187. [MITOXANTRONE HYDROCHLORIDE](#)  
(mitoxantrone hydrochloride)
188. [MORPHINE SULFATE](#)  
(Morphine Sulfate)
189. [MULTI-VITAMIN INFUSION](#)
190. [MYCOBUTIN®](#) Oral BCS0 1992 90s0  
(rifabutin)
191. [MYFEMBREE®](#) Tablets  
(relugolix, estradiol, and norethindrone acetate)
192. [MYLOTARG™](#)  
(gemtuzumab ozogamicin for injection)
193. [Nadolol Tablets](#) Oral BCS3 1979 70s3  
(nadolol)  
[doi.org/10.1021/mp070028i](https://doi.org/10.1021/mp070028i)
194. [NALBUPHINE HYDROCHLORIDE](#)  
(nalbuphine hydrochloride)
195. [NALOXONE HYDROCHLORIDE](#)

- (naloxone hydrochloride)
196. [NARDIL®](#) Oral BCS0 1961 60s0  
(phenelzine sulfate)
197. [NAVANE®](#) Oral BCS0  
(thiothixene)
198. [NEOSPORIN® G.U. Irrigant](#)  
(neomycin sulfate – polymyxin B sulfate)
199. [NEOSPORIN® Ophthalmic Solution](#)  
(neomycin and polymyxin B sulfates, and gramicidin)
200. [NEURONTIN®](#) Oral BCS3 2000-3 00s  
(gabapentin)  
<https://www.fda.gov/media/108504/download>
201. [NICOTROL® Inhaler](#)  
(nicotine)
202. [NICOTROL® NS](#)  
(nicotine)
203. [NIPENT™](#)  
(pentostatin)
204. [NITROSTAT®](#)  
(nitroglycerin)
205. [NIVESTYM™](#)  
(filgrastim-aafi)
206. [NORMINEST® FE Tablets and NORQUEST® FE Tablets](#) Oral BCS0  
norethindrone and ethinyl estradiol

207. [NORPACE® and NORPACE® CR](#) Oral BCS1 1977 70s1  
(disopyramide phosphate)  
<https://www.pfizermedicalinformation.com/en-us/norpace/description>
208. [North American Coral Snake Antivenin](#)  
(Equine)
209. [NORVASC®](#) Oral BCS1 1987 80s1  
(amlodipine besylate)  
[https://www.accessdata.fda.gov/drugsatfda\\_docs/nda/2018/210045Orig1s000ChemR.pdf](https://www.accessdata.fda.gov/drugsatfda_docs/nda/2018/210045Orig1s000ChemR.pdf)
210. [NYVEPRIA™](#)  
(pegfilgrastim-apgf)
211. [OCTAGAM](#)  
Immune Globulin Intravenous (Human)
212. [OGEN®](#) Oral BCS1 BCS3 1977-3 70s3  
(estropipate)  
<https://labeling.pfizer.com/ShowLabeling.aspx?id=668>
213. [ONDANSETRON](#)  
(ondansetron)
214. [ORGOVYX® Tablets](#) Oral BCS4 2020-4 20s4  
(relugolix)  
[https://www.accessdata.fda.gov/drugsatfda\\_docs/nda/2020/214621Orig1s000ChemR.pdf](https://www.accessdata.fda.gov/drugsatfda_docs/nda/2020/214621Orig1s000ChemR.pdf)
215. [OXALIPLATIN](#)  
(oxaliplatin)
216. [PACLITAXEL](#)  
(paclitaxel)

217. [Palonosetron Hydrochloride](#)  
(palonosetron hydrochloride)
218. [PAMIDRONATE DISODIUM](#)  
(pamidronate disodium)
219. [PANCURONIUM BROMIDE](#)  
(pancuronium bromide)
220. [PANZYGA](#)  
(immune globulin intravenous, human - ifas)
221. [PARICALCITOL](#)  
(paricalcitol)
222. [PAXLOVID™](#) Oral BCS4 2021-4 20s4  
(nirmatrelvir and ritonavir)  
[https://www.accessdata.fda.gov/drugsatfda\\_docs/nda/2010/022417s000\\_ChemR.pdf](https://www.accessdata.fda.gov/drugsatfda_docs/nda/2010/022417s000_ChemR.pdf)
223. [PEMETREXED INJECTION](#)
224. [PENICILLIN G PROCAINE](#)  
(penicillin g procaine)
225. [Pfizer-BioNTech COVID-19 Vaccine](#)  
(also known as BNT162b2)
226. [PFIZERPEN®](#)  
(penicillin G potassium)
227. [PHOSPHOLINE IODIDE®](#)  
(echothiophate iodide)
228. [PIPERACILLIN AND TAZOBACTAM](#)  
(piperacillin and tazobactam)
229. [PLEGISOL®](#)

(potassium chloride, sodium chloride, calcium chloride, and magnesium chloride)

230. [POTASSIUM ACETATE](#)

(potassium acetate)

231. [POTASSIUM CHLORIDE](#)

(potassium chloride)

232. [POTASSIUM PHOSPHATES](#)

(potassium phosphates)

233. [PRAZOSIN HYDROCHLORIDE](#) Oral BCS0 1988 80s0

(PRAZOSIN HYDROCHLORIDE)

234. [PRECEDEX™](#)

(dexmedetomidine hydrochloride)

235. [PREMARIN®](#) Oral BCS0

(conjugated estrogens)

236. [PREMPRO®/PREMPHASE®](#) Oral BCS0

(conjugated estrogens/medroxyprogesterone acetate)

237. [PREPIDIL®](#)

(dinoprostone)

238. [PREVNAR 13](#)

(pneumococcal 13-valent conjugate vaccine [diphtheria CRM197 Protein])

239. [Pnevnar 20™](#)

(Pneumococcal 20-valent Conjugate Vaccine)

240. [PRISTIQ®](#) Oral BCS1 2008-1 00s1

(desvenlafaxine)

[https://www.accessdata.fda.gov/drugsatfda\\_docs/label/2012/021992s0301bl.pdf](https://www.accessdata.fda.gov/drugsatfda_docs/label/2012/021992s0301bl.pdf)

241. [PROCAINAMIDE HYDROCHLORIDE](#)  
(procainamide hydrochloride)
242. [PROCARDIA®](#) Oral BCS2 1981 80s2  
(nifedipine)  
[https://www.accessdata.fda.gov/drugsatfda\\_docs/label/2011/020198s023lbl.pdf](https://www.accessdata.fda.gov/drugsatfda_docs/label/2011/020198s023lbl.pdf)
243. [PROPOFOL](#)  
(propofol)
244. [PROSTIN E2®](#)  
(dinoprostone)
245. [PROSTIN VR PEDIATRIC®](#)  
(alprostadil)
246. [PROTONIX®](#) Oral BCS3 2000-3 00s3  
(pantoprazole sodium)  
[https://ec.europa.eu/health/documents/community-register/2010/2010033072510/anx\\_72510\\_en.pdf](https://ec.europa.eu/health/documents/community-register/2010/2010033072510/anx_72510_en.pdf)
247. [PROVERA®](#) Oral BCS2 1959 50s2  
(medroxyprogesterone acetate)  
<https://extranet.who.int/pqweb/sites/default/files/RH074part6v02.pdf>
248. [PSORCON/FLORONE](#)  
diflorasone diacetate
249. [QUELICIN™](#)  
(succinylcholine chloride)
250. [R-GENE® 10](#)  
(arginine hydrochloride)
251. [RAPAMUNE®](#) Oral BCS2 1999 90s2

- (sirolimus)
- [https://www.ema.europa.eu/en/documents/scientific-guideline/sirolimus-coated-tablets-05-1-2-mg-oral-solution-1-mg/ml-product-specific-bioequivalence-guidance\\_en.pdf](https://www.ema.europa.eu/en/documents/scientific-guideline/sirolimus-coated-tablets-05-1-2-mg-oral-solution-1-mg/ml-product-specific-bioequivalence-guidance_en.pdf)
252. [RELPA<sup>®</sup>](#) Oral BCS1            2002-1            00s1
- (eletriptan HBr)
- [https://www.accessdata.fda.gov/drugsatfda\\_docs/label/2011/021016s0181bl.pdf](https://www.accessdata.fda.gov/drugsatfda_docs/label/2011/021016s0181bl.pdf)
253. [RETACRIT Injection](#)
- (epoetin alfa-epbx)
254. [REVATIO<sup>®</sup>](#) Oral BCS1            1998            90s1
- (sildenafil)
- [https://www.ema.europa.eu/en/documents/assessment-report/sildenafil-teva-epar-public-assessment-report\\_en.pdf](https://www.ema.europa.eu/en/documents/assessment-report/sildenafil-teva-epar-public-assessment-report_en.pdf)
255. [ROCURONIUM BROMIDE](#)
- (rocuronium bromide)
256. [ROPIVACAINE HYDROCHLORIDE](#)
- (ropivacaine hydrochloride)
257. [RUXIENC<sup>™</sup>](#)
- (rituximab-pvvr)
258. [SEGLUROMET<sup>™</sup> Tablets](#) Oral BCS3            2017-3            10s3
- (ertugliflozin and metformin HCl)
259. [SEPTRA<sup>®</sup>](#) Oral BCS0
- (trimethoprim and sulfamethoxazole)
260. [SILVADENE<sup>®</sup>](#)
- (silver sulfadiazine)
261. [SINEQUAN<sup>®</sup>](#) Oral BCS1            1969            60s1



(doxepin hydrochloride)

[https://www.accessdata.fda.gov/drugsatfda\\_docs/nda/2010/022036Orig1s000ClinPharmR.pdf](https://www.accessdata.fda.gov/drugsatfda_docs/nda/2010/022036Orig1s000ClinPharmR.pdf)

262. [SKELAXIN®](#) Oral BCS2 1962 60s2

(metaxalone)

[https://www.accessdata.fda.gov/drugsatfda\\_docs/label/2018/013217s057lbl.pdf](https://www.accessdata.fda.gov/drugsatfda_docs/label/2018/013217s057lbl.pdf)

263. [SODIUM ACETATE](#)

(sodium acetate)

264. [SODIUM BICARBONATE](#)

(sodium bicarbonate)

265. [SODIUM CHLORIDE](#)

(sodium chloride)

266. [SODIUM LACTATE](#)

(sodium lactate)

267. [SODIUM PHOSPHATES](#)

(monobasic sodium phosphate and dibasic sodium phosphate)

268. [SOLU-CORTEF®](#)

(hydrocortisone sodium succinate)

269. [SOLU-MEDROL®](#)

(methylprednisolone sodium succinate)

270. [SOMAVERT®](#)

(pegvisomant)

271. [SONATA® CIV](#) Oral BCS2 1999 90s2

(zaleplon)

[https://www.accessdata.fda.gov/drugsatfda\\_docs/label/2013/020859s013lbl.pdf](https://www.accessdata.fda.gov/drugsatfda_docs/label/2013/020859s013lbl.pdf)

272. [STEGLATRO™](#) Oral BCS1 2017-1 10s1  
(ertugliflozin)  
[https://www.ema.europa.eu/en/documents/assessment-report/steglatro-epar-public-assessment-report\\_en.pdf](https://www.ema.europa.eu/en/documents/assessment-report/steglatro-epar-public-assessment-report_en.pdf)
273. [STEGLUJAN™](#) Tablets Oral BCS1 2017-1 10s1  
(ertugliflozin and sitagliptin)  
[https://www.ema.europa.eu/en/documents/assessment-report/steglatro-epar-public-assessment-report\\_en.pdf](https://www.ema.europa.eu/en/documents/assessment-report/steglatro-epar-public-assessment-report_en.pdf)  
[https://www.ema.europa.eu/en/documents/scientific-guideline/sitagliptin-film-coated-tablets-25-50-100-mg-product-specific-bioequivalence-guidance\\_en.pdf](https://www.ema.europa.eu/en/documents/scientific-guideline/sitagliptin-film-coated-tablets-25-50-100-mg-product-specific-bioequivalence-guidance_en.pdf)
274. [SUFENTANIL CITRATE](#)  
(sufentanil citrate)
275. [SUTENT®](#) Oral BCS3 2006-3 00s3  
(sunitinib malate)  
[https://www.ema.europa.eu/en/documents/scientific-guideline/sunitinib-hard-capsules-125-25-375-50-mg-product-specific-bioequivalence-guidance\\_en.pdf](https://www.ema.europa.eu/en/documents/scientific-guideline/sunitinib-hard-capsules-125-25-375-50-mg-product-specific-bioequivalence-guidance_en.pdf)
276. [SYNAREL®](#)  
(nafarelin acetate)
277. [SYNERCID® I.V.](#)  
(quinupristin / dalfopristin)
278. [TACROLIMUS](#)  
(Tacrolimus)
279. [TALZENNA™](#) Oral BCS4 2018-4 10s4  
(talazoparib) Capsules  
[https://www.accessdata.fda.gov/drugsatfda\\_docs/nda/2018/211651Orig1s000ChemR.pdf](https://www.accessdata.fda.gov/drugsatfda_docs/nda/2018/211651Orig1s000ChemR.pdf)
280. [TAPAZOLE®](#) Oral BCS1 1950 50s1

(methimazole)

[https://www.accessdata.fda.gov/drugsatfda\\_docs/label/2012/040350s016lbl.pdf](https://www.accessdata.fda.gov/drugsatfda_docs/label/2012/040350s016lbl.pdf)

281. [TAZICEF®](#)

(ceftazidime)

282. [TESSALON®](#) Oral BCS0 1958 50s0

(benzonatate)

283. [TESTOSTERONE CYPIONATE](#)

(testosterone cypionate)

284. [THAM](#)

285. [THEOPHYLLINE](#)

(theophylline)

286. [THROMBI-GEL®](#)

(thrombin / gelatin foam hemostat)

287. [THROMBI-PAD®](#)

(3x3 hemostatic pad)

288. [THROMBIN-JMI®](#)

(thrombin, topical, bovine origin)

289. [TICOVAC](#)

(Tick-Borne Encephalitis Vaccine)

290. [TIKOSYN®](#) Oral BCS2 1999 90s

(dofetilide)

[https://www.accessdata.fda.gov/drugsatfda\\_docs/label/2016/207058Orig1s000lbl.pdf](https://www.accessdata.fda.gov/drugsatfda_docs/label/2016/207058Orig1s000lbl.pdf)

291. [TOBRAMYCIN](#)

(tobramycin)

292. [TOPOTECAN](#)

- (topotecan)
293. [TORISEL®](#)  
(temsirolimus)
294. [TOVIAZ™](#) Oral BCS0      2008-0      00s0  
(fesoterodine fumarate)
295. [TPN ELECTROLYTES](#)  
(sodium chloride, calcium chloride, potassium chloride, magnesium chloride, and sodium acetate anhydrous)
296. [TRAZIMERA for Injection](#)  
(trastuzumab-qyyp)
297. [TRECATOR®](#) Oral BCS2      1968      60s2  
(ethionamide)  
[https://www.accessdata.fda.gov/drugsatfda\\_docs/label/2006/013026s0241bl.pdf](https://www.accessdata.fda.gov/drugsatfda_docs/label/2006/013026s0241bl.pdf)
298. [TRIPHASIL-21® and TRIPHASIL-28® Tablets](#) Oral BCS0  
levonorgestrel and ethinyl estradiol - triphasic regimen
299. [TROBICIN™](#)  
(spectinomycin)
300. [TRUMENBA™](#)  
(Meningococcal Group B Vaccine)
301. [TYGACIL®](#)  
(tigecycline)
302. [UNASYN®](#)  
(ampicillin sodium/sulbactam sodium)
303. [Vancomycin Hydrochloride](#)  
(vancomycin hydrochloride)

304. [VANTIN®](#) Oral BCS0 1998 90s0  
(cefpodoxime proxetil)
305. [Vecuronium Bromide](#)  
(vecuronium bromide for injection)
306. [VERAPAMIL HYDROCHLORIDE](#)  
(verapamil hydrochloride)
307. [VFEND®](#) Oral BCS2 2002-2 00s2  
(voriconazole)  
[https://www.ema.europa.eu/en/documents/scientific-guideline/voriconazole-tablets-50-200-mg-powder-oral-suspension-40-mg/ml-product-specific-bioequivalence-guidance\\_en.pdf](https://www.ema.europa.eu/en/documents/scientific-guideline/voriconazole-tablets-50-200-mg-powder-oral-suspension-40-mg/ml-product-specific-bioequivalence-guidance_en.pdf)
308. [VIAGRA®](#) Oral BCS1 1998 90s1  
(sildenafil citrate)
309. [VIBRAMYCIN®](#) Oral BCS1  
(doxycycline calcium, doxycycline hyclate, doxycycline monohydrate)  
[https://www.accessdata.fda.gov/drugsatfda\\_docs/nda/2014/205931Orig1s000ClinPharmR.pdf](https://www.accessdata.fda.gov/drugsatfda_docs/nda/2014/205931Orig1s000ClinPharmR.pdf)
310. [VINCRISTINE SULFATE](#)  
(vincristine sulfate)
311. [VIRACEPT®](#) Oral BCS4 2003-4 00s4  
(nelfinavir mesylate)  
[https://www.accessdata.fda.gov/drugsatfda\\_docs/label/2005/021503s006lbl.pdf](https://www.accessdata.fda.gov/drugsatfda_docs/label/2005/021503s006lbl.pdf)
312. [VIROPTIC®](#)  
(trifluridine)
313. [VISTARIL®](#) Oral BCS1 1956 50s1  
(hydroxyzine pamoate)

- [https://www.accessdata.fda.gov/drugsatfda\\_docs/label/2014/088617Orig1s043,088618Orig1s043,088619Orig1s044lbl.pdf](https://www.accessdata.fda.gov/drugsatfda_docs/label/2014/088617Orig1s043,088618Orig1s043,088619Orig1s044lbl.pdf)
314. [VITAMIN K](#)  
(phytonadione)
315. [VIZIMPRO® Tablets](#) Oral BCS2                      2018-2                      10s2  
(dacomitinib)  
  
[https://www.ema.europa.eu/en/documents/assessment-report/vizimpro-epar-public-assessment-report\\_en.pdf](https://www.ema.europa.eu/en/documents/assessment-report/vizimpro-epar-public-assessment-report_en.pdf)
316. [VYNDAQEL® \(tafamidis meglumine\) Capsules and VYNDAMAX™ \(tafamidis\) Capsules](#) Oral BCS0                      2019-0                      10s0
317. [WATER](#)  
(water)
318. [XALATAN®](#)  
(latanoprost)
319. [XALKORI®](#) Oral BCS4                      2016-4                      10s4  
(crizotinib)  
  
[https://www.ema.europa.eu/en/documents/scientific-guideline/crizotinib-hard-capsules-200-mg-250-mg-product-specific-bioequivalence-guidance\\_en.pdf](https://www.ema.europa.eu/en/documents/scientific-guideline/crizotinib-hard-capsules-200-mg-250-mg-product-specific-bioequivalence-guidance_en.pdf)
320. [XANAX®](#) Oral BCS2                      1981                      80s2  
(alprazolam)  
  
[https://www.accessdata.fda.gov/drugsatfda\\_docs/label/2011/018276s0451bl.pdf](https://www.accessdata.fda.gov/drugsatfda_docs/label/2011/018276s0451bl.pdf)
321. [XELJANZ®](#) Oral BCS3                      2012-3                      10s3  
(tofacitinib)  
  
[https://www.ema.europa.eu/en/documents/assessment-report/xeljanz-epar-public-assessment-report\\_en-0.pdf](https://www.ema.europa.eu/en/documents/assessment-report/xeljanz-epar-public-assessment-report_en-0.pdf)
322. [XTANDI® \(enzalutamide\) capsules, for o use](#) Oral BCS2                      2012-2                      10s2

Enzalutamide

[https://www.accessdata.fda.gov/drugsatfda\\_docs/nda/2020/213674Orig1s000ChemR.pdf](https://www.accessdata.fda.gov/drugsatfda_docs/nda/2020/213674Orig1s000ChemR.pdf)

323. [XYNTHA®](#)

(antihemophilic factor (recombinant))

324. [ZARONTIN®](#) Oral BCS1 1960 60s1

(ethosuximide)

325. [ZINC](#)

(zinc chloride)

326. [ZINECARD®](#)

(dexrazoxane)

327. [ZIRABEV Injection](#)

(bevacizumab-bvzr)

328. [ZITHROMAX®](#) Oral BCS1 BCS3 1991 90s1

(azithromycin)

329. [ZMAX®](#) Oral BCS0 1991 90s1

(azithromycin extended release)

330. [ZOLEDRONIC ACID](#)

(zoledronic acid)

331. [ZOLOFT®](#) Oral BCS2 1999 90s2

(sertraline HCl)

[https://www.accessdata.fda.gov/drugsatfda\\_docs/label/2011/019839s072s075s076,020990s033s036s037lbl.pdf](https://www.accessdata.fda.gov/drugsatfda_docs/label/2011/019839s072s075s076,020990s033s036s037lbl.pdf)

332. [ZOSYN®](#)

(piperacillin and tazobactam)

333. [ZYVOX®](#) Oral BCS1 2000-1 00s1

(linezolid)

[https://extranet.who.int/pqweb/sites/default/files/documents/BE\\_linezolid\\_July2021.pdf](https://extranet.who.int/pqweb/sites/default/files/documents/BE_linezolid_July2021.pdf)



## Novartis products:

Novartis products worldwide

[https://www.novartis.com/about/products?search\\_api\\_fulltext=&sort\\_by=title&sort\\_order=DESC&page=9](https://www.novartis.com/about/products?search_api_fulltext=&sort_by=title&sort_order=DESC&page=9)

1. **Adakveo®** crizanlizumab
2. **Afinitor Disperz®/Votubia®** everolimus **oral BCS4 2009-4 00s4**  
[https://www.ema.europa.eu/en/documents/scientific-guideline/draft-everolimus-tablets-025-05-075-1mg-25-5-10mg-dispersible-tablets-01-025mg-2-3-5mg-product\\_en.pdf](https://www.ema.europa.eu/en/documents/scientific-guideline/draft-everolimus-tablets-025-05-075-1mg-25-5-10mg-dispersible-tablets-01-025mg-2-3-5mg-product_en.pdf)
3. **Afinitor®/Votubia®** everolimus **oral BCS4 2009-4 00s4**  
[https://www.ema.europa.eu/en/documents/scientific-guideline/draft-everolimus-tablets-025-05-075-1mg-25-5-10mg-dispersible-tablets-01-025mg-2-3-5mg-product\\_en.pdf](https://www.ema.europa.eu/en/documents/scientific-guideline/draft-everolimus-tablets-025-05-075-1mg-25-5-10mg-dispersible-tablets-01-025mg-2-3-5mg-product_en.pdf)
4. **Aimovig®** erenumab
5. **Arzerra®** ofatumumab
6. **Azarga®/Azorga®** brinzolamide, timolol
7. **Beovu®** brolocizumab
8. **Cibacen®** benazepril hydrochloride **oral BCS3 1991 90s3**  
[https://www.accessdata.fda.gov/drugsatfda\\_docs/label/2009/020033s038lbl.pdf](https://www.accessdata.fda.gov/drugsatfda_docs/label/2009/020033s038lbl.pdf)
9. **Ciprodex®** ciprofloxacin, dexamethasone
10. **Comtan®** entacapone **oral BCS4 1999 90s4**  
[https://www.ema.europa.eu/en/documents/assessment-report/entacapone-teva-epar-public-assessment-report\\_en.pdf](https://www.ema.europa.eu/en/documents/assessment-report/entacapone-teva-epar-public-assessment-report_en.pdf)
11. **Cosentyx®** secukinumab
12. **Diovan HCT® /Co-Diovan®** valsartan, hydrochlorothiazide **oral BCS0 1998 90s0**
13. **Diovan®** valsartan **oral BCS0 1996 90s0**
14. **Duotrav™** travoprost, timolol
15. **Durezol®** difluprednate
16. **Egaten®** triclabendazole **oral BCS2 BCS4 2019-4 10s4**  
[https://www.accessdata.fda.gov/drugsatfda\\_docs/nda/2018/208711Orig1s000ChemR.pdf](https://www.accessdata.fda.gov/drugsatfda_docs/nda/2018/208711Orig1s000ChemR.pdf)
17. **Entresto®** sacubitril, valsartan **oral BCS0 2015-0 10s0**
18. **Eucreas®** vildagliptin, metformin **oral BCS3 2008-3 00s3**  
[https://www.ema.europa.eu/en/documents/assessment-report/vildagliptin/metformin-hydrochloride-accord-epar-public-assessment-report\\_en.pdf](https://www.ema.europa.eu/en/documents/assessment-report/vildagliptin/metformin-hydrochloride-accord-epar-public-assessment-report_en.pdf)
19. **Exelon®** rivastigmine **oral BCS1 BCS3 2000-3 00s3**
20. **Exforge HCT®** valsartan, amlodipine besylate, hydrochlorothiazide **oral BCS0 2009-00s0**
21. **Exforge®** valsartan, amlodipine besylate **oral BCS0 2007-0 00s0**

22. Exjade® deferasirox oral BCS2 2005-2 00s2  
[https://www.accessdata.fda.gov/drugsatfda\\_docs/nda/2015/206910Orig1s000ClinPharmR.pdf](https://www.accessdata.fda.gov/drugsatfda_docs/nda/2015/206910Orig1s000ClinPharmR.pdf)
23. Extavia® interferon beta-1b
24. Farydak® panobinostat oral BCS2 2015-2 10s2  
[https://www.accessdata.fda.gov/drugsatfda\\_docs/nda/2015/205353Orig1s000ClinPharmR.pdf](https://www.accessdata.fda.gov/drugsatfda_docs/nda/2015/205353Orig1s000ClinPharmR.pdf)
- 25. Femara®** letrozole **oral BCS2 2001-2 00s2**  
[https://www.accessdata.fda.gov/drugsatfda\\_docs/label/2007/020726s014lbl.pdf](https://www.accessdata.fda.gov/drugsatfda_docs/label/2007/020726s014lbl.pdf)
- 26. Focalin®**dexmethylphenidate HCl, dexmethylphenidate extended rel **oral BCS1 2005-1 00s1**  
[https://www.ema.europa.eu/en/documents/referral/methylphenidate-hexal-article-29-referral-assessment-report\\_en.pdf](https://www.ema.europa.eu/en/documents/referral/methylphenidate-hexal-article-29-referral-assessment-report_en.pdf)
- 27. Focalin® XR**dexmethylphenidate HCl, dexmethylphenidate extended release) **oral BCS1 2005-1 00s1**
- 28. Galvus®** vildagliptin **oral BCS1 2007-1 00s1**  
[https://www.ema.europa.eu/en/documents/assessment-report/vildagliptin/metformin-hydrochloride-accord-epar-public-assessment-report\\_en.pdf](https://www.ema.europa.eu/en/documents/assessment-report/vildagliptin/metformin-hydrochloride-accord-epar-public-assessment-report_en.pdf)
- 29. Gilenya®** fingolimod **oral BCS2 BCS4 2010-4 10s4**  
[https://www.ema.europa.eu/en/documents/scientific-guideline/fingolimod-capsules-025-05-mg-product-specific-bioequivalence-guidance\\_en.pdf](https://www.ema.europa.eu/en/documents/scientific-guideline/fingolimod-capsules-025-05-mg-product-specific-bioequivalence-guidance_en.pdf)
- 30. Gleeevec®/Glivec®** imatinib mesylate **oral BCS0 2001-0 00s0**  
[https://www.ema.europa.eu/en/documents/scientific-guideline/imatinib-hard-capsules-50-100-mg-film-coated-tablets-100-400-mg-product-specific-bioequivalence\\_en.pdf](https://www.ema.europa.eu/en/documents/scientific-guideline/imatinib-hard-capsules-50-100-mg-film-coated-tablets-100-400-mg-product-specific-bioequivalence_en.pdf)
31. Ilaris® canakinumab
- 32. Ilevro®/Nevanac®** nepafenac
- 33. Izba®** travoprost
- 34. Jadenu®** deferasirox **oral BCS2 2005-2 00s2**  
[https://www.accessdata.fda.gov/drugsatfda\\_docs/nda/2015/206910Orig1s000ClinPharmR.pdf](https://www.accessdata.fda.gov/drugsatfda_docs/nda/2015/206910Orig1s000ClinPharmR.pdf)
- 35. Jakavi®** ruxolitinib **oral BCS1 2011-1 10s1**  
[https://ec.europa.eu/health/documents/community-register/2012/20120823123254/anx\\_123254\\_en.pdf](https://ec.europa.eu/health/documents/community-register/2012/20120823123254/anx_123254_en.pdf)
- 36. Kesimpta®** ofatumumab
- 37. Kisqali®** ribociclib **oral BCS4 2017-4 10s4**  
[https://www.accessdata.fda.gov/drugsatfda\\_docs/nda/2017/209092Orig1s000ChemR.pdf](https://www.accessdata.fda.gov/drugsatfda_docs/nda/2017/209092Orig1s000ChemR.pdf)
- 38. Kymriah®** tisagenlecleucel-T
- 39. Lamisil®** terbinafine (terbinafine hydrochloride)

|                                |                                                                                                                                                                                                                                                           |                |        |      |
|--------------------------------|-----------------------------------------------------------------------------------------------------------------------------------------------------------------------------------------------------------------------------------------------------------|----------------|--------|------|
| <b>40. Leqvio®</b>             | inclisiran                                                                                                                                                                                                                                                |                |        |      |
| <b>41. Lescol®</b>             | fluvastatin sodium                                                                                                                                                                                                                                        | oral BCS1      | 1999   | 90s1 |
| <b>42. Lescol® XL</b>          | fluvastatin sodium                                                                                                                                                                                                                                        |                |        |      |
| <b>43. Lucentis®</b>           | ranibizumab                                                                                                                                                                                                                                               |                |        |      |
| <b>44. Lutathera®</b>          | lutetium Lu 177 dotatate                                                                                                                                                                                                                                  |                |        |      |
| <b>45. Luxturna®</b>           | voretigene neparvovec                                                                                                                                                                                                                                     |                |        |      |
| <b>46. Mayzent®</b>            | siponimod                                                                                                                                                                                                                                                 | oral BCS2      | 2019-2 | 10s2 |
|                                | <a href="https://www.ema.europa.eu/en/documents/variation-report/mayzent-h-c-4712-x-07-epar-assessment-report-variation_en.pdf">https://www.ema.europa.eu/en/documents/variation-report/mayzent-h-c-4712-x-07-epar-assessment-report-variation_en.pdf</a> |                |        |      |
| <b>47. Mekinist®</b>           | trametinib                                                                                                                                                                                                                                                | oral BCS4      | 2013-4 | 10s4 |
|                                | <a href="https://www.ema.europa.eu/en/documents/assessment-report/mekinist-epar-public-assessment-report_en.pdf">https://www.ema.europa.eu/en/documents/assessment-report/mekinist-epar-public-assessment-report_en.pdf</a>                               |                |        |      |
| <b>48. Myfortic®</b>           | mycophenolic acid (as mycophenolate sodium)                                                                                                                                                                                                               | oral BCS       |        |      |
| 49. Neoral®/Sandimmune®        | cyclosporine, USP Modified                                                                                                                                                                                                                                | oral BCS0      |        | 1983 |
|                                | 80s0                                                                                                                                                                                                                                                      |                |        |      |
| <b>50. NETSPOT®</b>            | gallium Ga 68 dotatate injection                                                                                                                                                                                                                          |                |        |      |
| <b>51. Onbrez® Breezhaler®</b> | indacaterol                                                                                                                                                                                                                                               |                |        |      |
| <b>52. Pataday™</b>            | olopatadine                                                                                                                                                                                                                                               |                |        |      |
| <b>53. Patanol®</b>            | olopatadine                                                                                                                                                                                                                                               |                |        |      |
| <b>54. Pazeo®</b>              | olopatadine                                                                                                                                                                                                                                               |                |        |      |
| <b>55. Piqray®</b>             | alpelisib                                                                                                                                                                                                                                                 | oral BCS2      | 2019-2 | 10s2 |
| <b>56. Pluvicto™</b>           | lutetium Lu 177 vipivotide tetraxetan                                                                                                                                                                                                                     |                |        |      |
| <b>57. Proleukin®</b>          | aldesleukin                                                                                                                                                                                                                                               |                |        |      |
| <b>58. Promacta®/Revolade®</b> | eltrombopag                                                                                                                                                                                                                                               | oral BCS4      | 2008-4 | 00s4 |
|                                | <a href="https://www.accessdata.fda.gov/drugsatfda_docs/label/2008/022291lbl.pdf">https://www.accessdata.fda.gov/drugsatfda_docs/label/2008/022291lbl.pdf</a>                                                                                             |                |        |      |
| <b>59. Ritalin LA®</b>         | methylphenidate HCl modified release                                                                                                                                                                                                                      | oral BCS1      |        | 1955 |
|                                | 50s1                                                                                                                                                                                                                                                      |                |        |      |
|                                | <a href="https://www.ema.europa.eu/en/documents/referral/methylphenidate-hexal-article-29-referral-assessment-report_en.pdf">https://www.ema.europa.eu/en/documents/referral/methylphenidate-hexal-article-29-referral-assessment-report_en.pdf</a>       |                |        |      |
| <b>60. Ritalin®</b>            | methylphenidate HCl                                                                                                                                                                                                                                       | oral BCS1      | 1955   | 50s1 |
|                                | <a href="https://www.ema.europa.eu/en/documents/referral/methylphenidate-hexal-article-29-referral-assessment-report_en.pdf">https://www.ema.europa.eu/en/documents/referral/methylphenidate-hexal-article-29-referral-assessment-report_en.pdf</a>       |                |        |      |
| <b>61. Rydapt®</b>             | midostaurin                                                                                                                                                                                                                                               | oral BCS2      | 2017-2 | 10s2 |
|                                | <a href="https://www.accessdata.fda.gov/drugsatfda_docs/nda/2017/207997Orig1Orig2s000CrossR.pdf">https://www.accessdata.fda.gov/drugsatfda_docs/nda/2017/207997Orig1Orig2s000CrossR.pdf</a>                                                               |                |        |      |
| <b>62. Sandostatin LAR®</b>    | octreotide acetate                                                                                                                                                                                                                                        |                |        |      |
| <b>63. Sandostatin® SC</b>     | octreotide acetate                                                                                                                                                                                                                                        |                |        |      |
| <b>64. Scemblix®</b>           | asciminib                                                                                                                                                                                                                                                 | oral BCS2 BCS4 | 2021-4 | 20s4 |
|                                | <a href="https://www.accessdata.fda.gov/drugsatfda_docs/nda/2021/215358Orig1s000,Orig2s000ChemR.pdf">https://www.accessdata.fda.gov/drugsatfda_docs/nda/2021/215358Orig1s000,Orig2s000ChemR.pdf</a>                                                       |                |        |      |
| <b>65. Seebri Breezhaler®</b>  | glycopyrronium bromide                                                                                                                                                                                                                                    |                |        |      |
| <b>66. Simbrinza®</b>          | brinzolamide, brimonidine tartrate                                                                                                                                                                                                                        |                |        |      |

|                                                             |                                                                                                                                                                                                                                                                                                                                           |                |        |      |
|-------------------------------------------------------------|-------------------------------------------------------------------------------------------------------------------------------------------------------------------------------------------------------------------------------------------------------------------------------------------------------------------------------------------|----------------|--------|------|
| <b>67. Simulect®</b>                                        | basiliximab                                                                                                                                                                                                                                                                                                                               |                |        |      |
| <b>68. Stalevo®</b><br>2003-4 00s4                          | carbidopa, levodopa, entacapone                                                                                                                                                                                                                                                                                                           | oral BCS4      |        |      |
|                                                             | <a href="https://www.ema.europa.eu/en/documents/assessment-report/entacapone-teva-epar-public-assessment-report_en.pdf">https://www.ema.europa.eu/en/documents/assessment-report/entacapone-teva-epar-public-assessment-report_en.pdf</a>                                                                                                 |                |        |      |
| <b>69. Systane®</b>                                         | polyethylene glycol 400, propylene glycol                                                                                                                                                                                                                                                                                                 |                |        |      |
| <b>70. Systane® Balance</b>                                 | propylene glycol                                                                                                                                                                                                                                                                                                                          |                |        |      |
| <b>71. Systane® Hydration</b>                               | polyethylene glycol 400, propylene glycol, hyaluronic acid                                                                                                                                                                                                                                                                                |                |        |      |
| <b>72. Systane® Ultra</b>                                   | polyethylene glycol 400, propylene glycol                                                                                                                                                                                                                                                                                                 |                |        |      |
| <b>73. Tabrecta®</b>                                        | capmatinib                                                                                                                                                                                                                                                                                                                                | oral BCS2      | 2020-2 | 20s2 |
|                                                             | <a href="https://www.accessdata.fda.gov/drugsatfda_docs/nda/2020/213591Orig1s000MultidisciplineR.pdf">https://www.accessdata.fda.gov/drugsatfda_docs/nda/2020/213591Orig1s000MultidisciplineR.pdf</a>                                                                                                                                     |                |        |      |
| <b>74. Tafinlar®</b>                                        | dabrafenib                                                                                                                                                                                                                                                                                                                                | oral BCS2      | 2013-2 | 10s2 |
|                                                             | <a href="https://www.ema.europa.eu/en/documents/assessment-report/tafinlar-epar-public-assessment-report_en.pdf">https://www.ema.europa.eu/en/documents/assessment-report/tafinlar-epar-public-assessment-report_en.pdf</a>                                                                                                               |                |        |      |
| <b>75. Tasigna®</b>                                         | nilotinib                                                                                                                                                                                                                                                                                                                                 | oral BCS4      | 2007-4 | 00s4 |
|                                                             | <a href="https://www.ema.europa.eu/en/documents/scientific-discussion/tasigna-epar-scientific-discussion_en.pdf">https://www.ema.europa.eu/en/documents/scientific-discussion/tasigna-epar-scientific-discussion_en.pdf</a>                                                                                                               |                |        |      |
| <b>76. Tegretol®</b><br>10.1016/j.xphs.2021.02.0190022-3549 | carbamazepine                                                                                                                                                                                                                                                                                                                             | oral BCS2      | 1968   | 60s2 |
|                                                             | <a href="https://www.fda.gov/media/108504/download">https://www.fda.gov/media/108504/download</a>                                                                                                                                                                                                                                         |                |        |      |
| <b>77. TOBI®</b>                                            | tobramycin                                                                                                                                                                                                                                                                                                                                |                |        |      |
| <b>78. TOBI® Podhaler™</b>                                  | tobramycin                                                                                                                                                                                                                                                                                                                                |                |        |      |
| <b>79. Tobradex®</b>                                        | tobramycin, dexamethasone                                                                                                                                                                                                                                                                                                                 |                |        |      |
| <b>80. Travatan Z®</b>                                      | travoprost                                                                                                                                                                                                                                                                                                                                |                |        |      |
| <b>81. Travatan®</b>                                        | travoprost                                                                                                                                                                                                                                                                                                                                |                |        |      |
| <b>82. Travatan® BAK-Free</b>                               | travoprost                                                                                                                                                                                                                                                                                                                                |                |        |      |
| <b>83. Trileptal®</b>                                       | oxcarbazepine                                                                                                                                                                                                                                                                                                                             | oral BCS2      | 2000-2 | 00s2 |
|                                                             | <a href="https://www.fda.gov/files/drugs/published/Oxcarbazepine-202810-Clinpharm-PREA.pdf">https://www.fda.gov/files/drugs/published/Oxcarbazepine-202810-Clinpharm-PREA.pdf</a>                                                                                                                                                         |                |        |      |
| <b>84. Tyverb®</b>                                          | lapatinib                                                                                                                                                                                                                                                                                                                                 | oral BCS2 BCS4 | 2007-4 | 00s4 |
|                                                             | <a href="https://www.ema.europa.eu/en/documents/scientific-guideline/lapatinib-film-coated-tablet-250-mg-product-specific-bioequivalence-guidance-first-version_en.pdf">https://www.ema.europa.eu/en/documents/scientific-guideline/lapatinib-film-coated-tablet-250-mg-product-specific-bioequivalence-guidance-first-version_en.pdf</a> |                |        |      |
| <b>85. Ultibro® Breezhaler®</b>                             | indacaterol, glycopyrronium bromide                                                                                                                                                                                                                                                                                                       |                |        |      |
| <b>86. Vioice®</b>                                          | alpelisib                                                                                                                                                                                                                                                                                                                                 | oral BCS2      | 2022-2 | 20s2 |
|                                                             | <a href="https://www.accessdata.fda.gov/drugsatfda_docs/nda/2019/212526Orig1s000MultidisciplineR.pdf">https://www.accessdata.fda.gov/drugsatfda_docs/nda/2019/212526Orig1s000MultidisciplineR.pdf</a>                                                                                                                                     |                |        |      |
| <b>87. Votrient®</b>                                        | pazopanib                                                                                                                                                                                                                                                                                                                                 | oral BCS2      | 2009-2 | 00s2 |
|                                                             | <a href="https://www.accessdata.fda.gov/drugsatfda_docs/nda/2009/022465s000_ChemR.pdf">https://www.accessdata.fda.gov/drugsatfda_docs/nda/2009/022465s000_ChemR.pdf</a>                                                                                                                                                                   |                |        |      |
| <b>88. Xolair®</b>                                          | omalizumab                                                                                                                                                                                                                                                                                                                                |                |        |      |
| <b>89. Zolgensma®</b>                                       | onasemnogene abeparvovec                                                                                                                                                                                                                                                                                                                  |                |        |      |

90. **Zometa®** zoledronic acid
91. **Zortress®/Certican®** everolimus **oral BCS2 BCS 4** **2009-4** **00s4**  
[https://www.ema.europa.eu/en/documents/scientific-guideline/draft-everolimus-tablets-025-05-075-1mg-25-5-10mg-dispersible-tablets-01-025mg-2-3-5mg-product\\_en.pdf](https://www.ema.europa.eu/en/documents/scientific-guideline/draft-everolimus-tablets-025-05-075-1mg-25-5-10mg-dispersible-tablets-01-025mg-2-3-5mg-product_en.pdf)
92. **Zykadia®** ceritinib **oral BCS4** **2017-4** **10s4**  
[https://www.accessdata.fda.gov/drugsatfda\\_docs/nda/2014/205755orig1s000clinpharmr.pdf](https://www.accessdata.fda.gov/drugsatfda_docs/nda/2014/205755orig1s000clinpharmr.pdf)

**AbbVie products (<https://www.abbvie.com/our-science/products.html>):**

Excluding medical aesthetics products and eye care products

1. [HUMIRA®](#)

[\(adalimumab\) injection, for subcutaneous use](#)

[Learn about HUMIRA®](#)

2. [RINVOQ™](#) **oral BCS1** **2019-1** **10s1**

[\(upadacitinib\) extended-release tablets for o use](#)

[Learn about RINVOQ™](#)

[https://www.accessdata.fda.gov/drugsatfda\\_docs/nda/2019/211675Orig1s000ChemR.pdf](https://www.accessdata.fda.gov/drugsatfda_docs/nda/2019/211675Orig1s000ChemR.pdf)

3. [SKYRIZI®](#)

[\(risankizumab-rzaa\) injection, for subcutaneous use](#)

[Learn about SKYRIZI®](#)

Neuroscience  
Description

•

4. [BOTOX®](#)

[\(onabotulinumtoxinA\) for injection, for intramuscular, intradetrusor, or intradermal use](#)

[Learn about BOTOX®](#)

•

5. [CELEXA®](#) **oral BCS0** **1998** **90s0**

[\(citalopram hydrobromide\) tablets](#)

[Learn about CELEXA®](#)

•

6. [DEPAKOTE®](#) **oral BCS2** **1983** **80s2**

[\(divalproex sodium\) delayed-release tablets, for o use](#)

[Learn about DEPAKOTE®](#)

[https://www.accessdata.fda.gov/drugsatfda\\_docs/nda/2002/020782\\_s000\\_Depakote\\_Chemr.pdf](https://www.accessdata.fda.gov/drugsatfda_docs/nda/2002/020782_s000_Depakote_Chemr.pdf)

•

7. [DEPAKOTE® ER](#) **oral BCS2** **2000-2** **00s2**

[\(divalproex sodium\) extended-release tablets, for o use](#)

[Learn about DEPAKOTE® ER](#)

•

8. [DEPAKOTE® SPRINKLE CAPSULES](#) **oral BCS2** **1989** **80s2**

[\(divalproex sodium\) delayed release capsules, for o use](#)

[Learn about DEPAKOTE® SPRINKLE CAPSULES](#)

•

9. [DUOPA](#) **oral BCS1**    **1975**    **70s1**

[\(carbidopa and levodopa\) enteral suspension](#)

[Learn about DUOPA](#)

[https://www.accessdata.fda.gov/drugsatfda\\_docs/nda/2015/203312Orig1s000ClinPharmR.pdf](https://www.accessdata.fda.gov/drugsatfda_docs/nda/2015/203312Orig1s000ClinPharmR.pdf)  
[https://www.accessdata.fda.gov/drugsatfda\\_docs/nda/2015/203312Orig1s000ClinPharmR.pdf](https://www.accessdata.fda.gov/drugsatfda_docs/nda/2015/203312Orig1s000ClinPharmR.pdf)

•

10. [FETZIMA®](#) **oral BCS1**    **2013-1**    **10s1**

[\(levomilnacipran\) extended-release capsules, for o use](#)

[Learn about FETZIMA®](#)

[https://www.accessdata.fda.gov/drugsatfda\\_docs/nda/2013/204168orig1s000clinpharmr.pdf](https://www.accessdata.fda.gov/drugsatfda_docs/nda/2013/204168orig1s000clinpharmr.pdf)

•

11. [FIORINAL®](#) **oral BCS1 BCS3**    **1976**    **70s3**

[\(Butalbital, Aspirin, and Caffeine Capsules, USP\), CIII](#)

[Learn about FIORINAL®](#)

[https://www.accessdata.fda.gov/drugsatfda\\_docs/nda/2009/040885Orig1s000.pdf](https://www.accessdata.fda.gov/drugsatfda_docs/nda/2009/040885Orig1s000.pdf)

[10.1002/jps.23212](https://www.accessdata.fda.gov/drugsatfda_docs/nda/2009/040885Orig1s000.pdf)

•

12. [FIORINAL® WITH CODEINE](#) **oral BCS1 BCS3**    **1990**    **90s3**  
[\(butalbital, aspirin, caffeine, and codeine phosphate\) capsules, for o use, CIII](#)

[Learn about FIORINAL® WITH CODEINE](#)

[10.1002/jps.23977](https://www.accessdata.fda.gov/drugsatfda_docs/nda/2009/040885Orig1s000.pdf)

•

13. [LEXAPRO®](#) **oral BCS0 2002-0 00s0**

[\(escitalopram oxalate\) o solution](#)

[\(escitalopram oxalate\) tablets, for o use](#)

[Learn about LEXAPRO®](#)

•

14. [NAMENDA XR®](#) **oral BCS1 2003-1 00s1**

[\(memantine hydrochloride\) extended release capsules, for o use](#)

[Learn about NAMENDA XR®](#)

[https://www.accessdata.fda.gov/drugsatfda\\_docs/nda/2005/021627s000\\_Namenda\\_ClinPharmR.pdf](https://www.accessdata.fda.gov/drugsatfda_docs/nda/2005/021627s000_Namenda_ClinPharmR.pdf)

•

15. [NAMENDA®](#) **oral BCS1 2003-1 00s1**

[\(memantine HCl\) tablets, for o use](#)

[Learn about NAMENDA®](#)

•

16. [NAMZARIC®](#) **oral BCS1 2014-1 10s1**

[\(memantine and donepezil hydrochlorides\) extended-release capsules, for o use](#)

[Learn about NAMZARIC®](#)

[https://www.ema.europa.eu/en/documents/assessment-report/balaxur-epar-refusal-public-assessment-report\\_en.pdf](https://www.ema.europa.eu/en/documents/assessment-report/balaxur-epar-refusal-public-assessment-report_en.pdf)

•

17. [QULIPTA™](#) **oral BCS2 BCS4 2021-4 20s4**



[\(atogepant\) tablets, for o use](#)

[Learn about QULIPTA™](#)

[https://www.accessdata.fda.gov/drugsatfda\\_docs/label/2021/215206Orig1s000lbl.pdf](https://www.accessdata.fda.gov/drugsatfda_docs/label/2021/215206Orig1s000lbl.pdf)

•

18. [SAPHRIS®](#)

[\(asenapine\) sublingual tablets](#)

[Learn about SAPHRIS®](#)

•

19. [SAVELLA®](#) **oral BCS1 2009-1 00s1**

[\(milnacipran HCl\) tablets](#)

[Learn about SAVELLA®](#)

[https://www.accessdata.fda.gov/drugsatfda\\_docs/label/2016/022256s022lbl.pdf](https://www.accessdata.fda.gov/drugsatfda_docs/label/2016/022256s022lbl.pdf)

•

20. [UBRELVY™](#) **oral BCS4 2019-4 10s4**

[\(ubrogepant\) tablets, for o use](#)

[Learn about UBRELVY™](#)

[https://www.accessdata.fda.gov/drugsatfda\\_docs/nda/2019/211765Orig1s000ChemR.pdf](https://www.accessdata.fda.gov/drugsatfda_docs/nda/2019/211765Orig1s000ChemR.pdf)

•

21. [VIIBRYD®](#) **oral BCS0 2011-0 10s0**

[\(vilazodone hydrochloride\) tablets, for o use](#)

[Learn about VIIBRYD®](#)

[https://www.accessdata.fda.gov/drugsatfda\\_docs/nda/2011/022567Orig1s000ClinPharmR.pdf](https://www.accessdata.fda.gov/drugsatfda_docs/nda/2011/022567Orig1s000ClinPharmR.pdf)

•

22. [VRAYLAR®](#) **oral BCS2**                      **2015-2**                      **10s2**

[\(cariprazine\) capsules, for o use](#)

[Learn about VRAYLAR®](#)

[https://www.ema.europa.eu/en/documents/assessment-report/reagila-epar-public-assessment-report\\_en.pdf](https://www.ema.europa.eu/en/documents/assessment-report/reagila-epar-public-assessment-report_en.pdf)

Oncology

•

23. [VENCLEXTA®](#) **oral BCS4**                      **2016-4**                      **10s4**

[\(venetoclax tablets\), for o use](#)

[Learn about VENCLEXTA®](#)

[https://www.ema.europa.eu/en/documents/assessment-report/venclxyto-epar-public-assessment-report\\_en.pdf](https://www.ema.europa.eu/en/documents/assessment-report/venclxyto-epar-public-assessment-report_en.pdf)

Virology

•

24. [KALETRA®](#) **oral BCS4**                      **2000-4**                      **00s4**

[\(lopinavir/ritonavir\) tablets, for o use and o solution](#)

[Learn about KALETRA®](#)

[https://www.accessdata.fda.gov/drugsatfda\\_docs/nda/2010/022417s000\\_ChemR.pdf](https://www.accessdata.fda.gov/drugsatfda_docs/nda/2010/022417s000_ChemR.pdf)

[https://www.accessdata.fda.gov/drugsatfda\\_docs/nda/2010/022417s000\\_ChemR.pdf](https://www.accessdata.fda.gov/drugsatfda_docs/nda/2010/022417s000_ChemR.pdf)

•

25. [MAVYRET®](#) **oral BCS4**                      **2017-4**                      **10s4**

[\(glecaprevir/pibrentasvir\) tablets, for o use](#)

[Learn about MAVYRET®](#)

[https://www.ema.europa.eu/en/documents/assessment-report/maviret-epar-public-assessment-report\\_en.pdf](https://www.ema.europa.eu/en/documents/assessment-report/maviret-epar-public-assessment-report_en.pdf)

•

26. [NORVIR®](#) oral BCS4 1996 90s4

[\(ritonavir\) tablets, for o use and o solution and oral powder](#)

[Learn about NORVIR®](#)

[https://www.accessdata.fda.gov/drugsatfda\\_docs/nda/2010/022417s000\\_ChemR.pdf](https://www.accessdata.fda.gov/drugsatfda_docs/nda/2010/022417s000_ChemR.pdf)

•

27. [VIEKIRA PAK®](#) oral BCS4 2014-4 10s4

[\(ombitasvir, paritaprevir and ritonavir tablets; dasabuvir tablets\), co-packaged for o use](#)

[Learn about VIEKIRA PAK®](#)

[https://www.accessdata.fda.gov/drugsatfda\\_docs/nda/2010/022417s000\\_ChemR.pdf](https://www.accessdata.fda.gov/drugsatfda_docs/nda/2010/022417s000_ChemR.pdf)

#### Other Specialty Areas

•

28. [ACTONEL®](#) oral BCS3 1998 90s3

[\(risedronate sodium\) tablets, for o use](#)

[Learn about ACTONEL®](#)

[https://www.accessdata.fda.gov/drugsatfda\\_docs/nda/98/20835\\_actonel\\_biopharmr.pdf](https://www.accessdata.fda.gov/drugsatfda_docs/nda/98/20835_actonel_biopharmr.pdf)

•

29. [AEROCHAMBER PLUS® FLOW-VU®](#)

[Anti-Static Valved Holding Chamber Small Mask/Medium Mask](#)

[Anti-Static Valved Holding Chamber Mouthpiece/Large Mask](#)

[Learn about AEROCHAMBER PLUS® FLOW-VU®](#)

•

30. [ALORA®](#)

(estradiol transdermal system)

Learn about ALORA®

•

31. ANDRODERM®

(testosterone transdermal system), for topical use CIII

Learn about ANDRODERM®

•

32. ANDROGEL®

(testosterone gel) 1.62%

Learn about ANDROGEL®

•

33. AQUADEKS®

chewable tablets (aqua-dex') multivitamin and mineral supplement

Learn about AQUADEKS®

•

34. ARMOUR® THYROID **oral BCS0**

(thyroid tablets, USP)

Learn about ARMOUR® THYROID

•

35. [AELVIA®](#) **oral BCS3 1998** **90s3**

[\(risedronate sodium\) delayed-release tablets](#)

[Learn about AELVIA®](#)

[https://www.accessdata.fda.gov/drugsatfda\\_docs/nda/98/20835\\_actonel\\_biopharmr.pdf](https://www.accessdata.fda.gov/drugsatfda_docs/nda/98/20835_actonel_biopharmr.pdf)

•

36. [AVAGE®](#)

[\(tazarotene\) cream 0.1%, for topical use](#)

[Learn about AVAGE®](#)

•

37. [AVYCAZ®](#)

[\(ceftazidime and avibactam\) for injection, for intravenous use](#)

[Learn about AVYCAZ®](#)

•

38. [BYSTOLIC®](#) **oral BCS0** **2007-0** **00s0**

[\(nebivolol\) tablets, for o use](#)

[Learn about BYSTOLIC®](#)

•

39. [CONDYLOX® Gel 0.5%](#)

[\(podofilox gel\)](#)

[Learn about CONDYLOX® Gel 0.5%](#)

•

40. [CREON® oral BCS0](#) 2009-0 00s0

[\(pancrelipase\) Delayed-Release Capsules for o use](#)

[Learn about CREON®](#)

•

41. [CRINONE®](#)

[\(progesterone gel\), for vaginal use](#)

[Learn about CRINONE®](#)

•

42. [DALVANCE®](#)

[\(dalbavancin\) for injection, for intravenous use](#)

[Learn about DALVANCE®](#)

•

43. [ENABLEX® oral BCS0](#) 2004-0 00s0

[\(darifenacin\) extended-release tablets](#)

[Learn about ENABLEX®](#)

•

44. [ESTRACE® Cream](#)

[\(estradiol vaginal cream, USP, 0.01%\)](#)

[Learn about ESTRACE® Cream](#)

•

45. [ESTROSTEP® FE](#) **oral BCS0**      **1973**      **70s0**

[\(norethindrone acetate and ethinyl estradiol tablets, USP and ferrous fumarate tablets\)](#)

[Learn about ESTROSTEP® FE](#)

•

46. [FEMHRT®](#) **oral BCS0**      **1973**      **70s0**

[\(norethindrone acetate/ethinyl estradiol tablets\)](#)

[Learn about FEMHRT®](#)

•

47. [GELNIQUE®](#)

[\(oxybutynin chloride\) 10% gel](#)

[Learn about GELNIQUE®](#)

•

48. [GENERESS® FE](#)

[\(norethindrone and ethinyl estradiol chewable tablets and ferrous fumarate chewable tablets\)](#)

[Learn about GENERESS® FE](#)

•

49. [GENGRAF® Capsules](#) **oral BCS0**      **1983**      **80s0**

[\(cyclosporine capsules, USP \[modified\]\)](#)

[Learn about GENGRAF® Capsules](#)

•

50. [GENGRAF® Solution](#) **oral BCS0** **1983** **80s0**

[\(cyclosporine o solution, USP \[modified\]\)](#)

[Learn about GENGRAF® O Solution](#)

•

51. [INFED®](#)

[\(iron dextran Injection USP\)](#)

[Learn about INFED®](#)

•

52. [K-TAB®](#)

[\(potassium chloride\) extended-release tablets, for o use](#)

[Learn about K-TAB®](#)

•

53. [KADIAN®](#) **oral BCS3** **1941** **40s3**

[\(morphine sulfat\) extended-release capsules, for o use, CII](#)

[Learn about KADIAN®](#)

[https://www.accessdata.fda.gov/drugsatfda\\_docs/nda/2011/201517Orig1s000SumR.pdf](https://www.accessdata.fda.gov/drugsatfda_docs/nda/2011/201517Orig1s000SumR.pdf)

•

54. [LILETTA®](#)



[\(levonorgestrel-releasing intrauterine system\) SHI](#)

[Learn about LILETTA®](#)

•

55. [LO LOESTRIN® FE](#) **oral BCS0**      **1968**      **60s0**

[\(norethindrone acetate and ethinyl estradiol tablets, ethinyl estradiol tablets and ferrous fumarate tablets\)](#)

[Learn about LO LOESTRIN® FE](#)

•

56. [LUPANETA PACK®](#)

[\(leuprolide acetate for depot suspension and norethindrone acetate tablets\), co-packaged for intramuscular use and for o use, respectively](#)

[Learn about LUPANETA PACK®](#)

•

57. [LUPRON DEPOT-PED®](#)

[\(leuprolide acetate for depot suspension\)](#)

[Learn about LUPRON DEPOT-PED®](#)

•

58. [LUPRON DEPOT® GYN](#)

[\(leuprolide acetate for depot suspension\)](#)

[Learn about LUPRON DEPOT® GYN](#)

•

59. [LUPRON DEPOT® URO](#)

[\(leuprolide acetate for depot suspension\)](#)

[Learn about LUPRON DEPOT® URO](#)

•

60. [MINASTRIN® 24 Fe](#) **oral BCS0** **1968** **60s0**

[\(norethindrone acetate and ethinyl estradiol tablets and ferrous fumarate tablets\)](#)

[Learn about MINASTRIN® 24 Fe](#)

•

61. [MONUROL®](#) **oral BCS1** **1996** **90s1**

[\(fosfomycin tromethamine\) granules for o solution](#)

[Learn about MONUROL®](#)

[https://www.accessdata.fda.gov/drugsatfda\\_docs/nda/96/050717Orig1s000rev.pdf](https://www.accessdata.fda.gov/drugsatfda_docs/nda/96/050717Orig1s000rev.pdf)

•

62. [NEPHRO-VITE®RX](#)

[\(vitamin B complex and C supplement\)](#)

[Learn about NEPHRO-VITE®RX](#)

•

63. [NIASPAN®](#) **oral BCS1** **1997** **90s1**

[\(niacin extended-release tablets\) for o use](#)

[Learn about NIASPAN®](#)

[https://www.accessdata.fda.gov/drugsatfda\\_docs/nda/2008/022078s000\\_ChemR.pdf](https://www.accessdata.fda.gov/drugsatfda_docs/nda/2008/022078s000_ChemR.pdf)

•

64. [NIMBEX®](#)

[\(cisatracurium besylate\) injection, for intravenous use](#)

[Learn about NIMBEX®](#)

•

65. [NORCO®](#) **oral BCS1** **1982** **80s2**

[\(hydrocodone bitartrate and acetaminophen tablets, USP\) CII](#)

[Learn about NORCO®](#)

[https://www.accessdata.fda.gov/drugsatfda\\_docs/nda/2014/205474Orig1s000ClinPharmR.pdf](https://www.accessdata.fda.gov/drugsatfda_docs/nda/2014/205474Orig1s000ClinPharmR.pdf)

[https://www.ema.europa.eu/en/documents/scientific-guideline/draft-paracetamol-oral-use-immediate-release-formulations-product-specific-bioequivalence-guidance\\_en.pdf](https://www.ema.europa.eu/en/documents/scientific-guideline/draft-paracetamol-oral-use-immediate-release-formulations-product-specific-bioequivalence-guidance_en.pdf)

•

66. [ORIAHNN®](#) **oral BCS0** **2020-0** **20s0**

[\(elagolix, estradiol, and norethindrone acetate capsules; elagolix capsules\) co-packaged for o use](#)

[Learn about ORIAHNN®](#)

•

67. [ORILISSA®](#) **oral BCS3** **2018-3** **10s3**

[\(elagolix\) tablets, for o use](#)

[Learn about ORILISSA®](#)

[https://www.accessdata.fda.gov/drugsatfda\\_docs/nda/2018/210450Orig1s000ChemR.pdf](https://www.accessdata.fda.gov/drugsatfda_docs/nda/2018/210450Orig1s000ChemR.pdf)

•

68. [OXYTROL®](#)

[\(oxybutynin transdermal system\)](#)

[Learn about OXYTROL®](#)

•

69. [RAPAFLO®](#) **oral BCS4**                      **2008-4**                      **00s4**

[\(silodosin\) capsules, for o use](#)

[Learn about RAPAFLO®](#)

[https://www.accessdata.fda.gov/drugsatfda\\_docs/label/2013/022206s012lbl.pdf](https://www.accessdata.fda.gov/drugsatfda_docs/label/2013/022206s012lbl.pdf)

•

70. [RECTIV®](#)

[\(nitroglycerin\) ointment 0.4%, for intra-anal use](#)

[Learn about RECTIV®](#)

•

71. [SURVANTA®](#)

[\(beractant\) intratracheal suspension](#)

[Learn about SURVANTA®](#)

•

72. [SYNTHROID®](#) **oral BCS0**                      **2000-0**                      **00s0**

[\(levothyroxine sodium\) tablets, for o use](#)

[Learn about SYNTHROID®](#)

[https://www.ema.europa.eu/en/documents/scientific-guideline/levothyroxine-tablets-125-mcg-25-mcg-50-mcg-75-mcg-100-mcg-200-mcg-additional-strengths-within-range\\_en.pdf](https://www.ema.europa.eu/en/documents/scientific-guideline/levothyroxine-tablets-125-mcg-25-mcg-50-mcg-75-mcg-100-mcg-200-mcg-additional-strengths-within-range_en.pdf)

•

73. [TARKA®](#) **oral BCS1** 1996 90s1

[\(trandolapril/verapamil HCl ER tablets\)](#)

[Learn about TARKA®](#)

[https://www.accessdata.fda.gov/drugsatfda\\_docs/label/2016/018925s010lbl.pdf](https://www.accessdata.fda.gov/drugsatfda_docs/label/2016/018925s010lbl.pdf)

[https://www.accessdata.fda.gov/drugsatfda\\_docs/label/2012/020528s020,020591s020lbl.pdf](https://www.accessdata.fda.gov/drugsatfda_docs/label/2012/020528s020,020591s020lbl.pdf)

•

74. [TAYTULLA®](#) **oral BCS0** 1968 60s0

[\(norethindrone acetate and ethinyl estradiol capsules and ferrous fumarate capsules\), for o  
use](#)

[Learn about TAYTULLA®](#)

•

75. [TEFLARO®](#)

[\(ceftaroline fosamil\) for injection, for intravenous use](#)

[Learn about TEFLARO®](#)

•

76. [THYROLAR® Tablets](#) **oral BCS0**

[\(liotrix tablets, USP\)](#)

[Learn about THYROLAR® Tablets](#)

•

77. TRICOR® **oral BCS2**                      **1993**                      **90s2**

(fenofibrate) tablets, for o use

Learn about TRICOR®

[https://www.accessdata.fda.gov/drugsatfda\\_docs/nda/2007/022118s000\\_ChemR.pdf](https://www.accessdata.fda.gov/drugsatfda_docs/nda/2007/022118s000_ChemR.pdf)

•

78. TRILIPIX® **oral BCS2**                      **2008-2**                      **00s2**

(fenofibric acid) delayed-release capsules

Learn about TRILIPIX®

[https://www.accessdata.fda.gov/drugsatfda\\_docs/nda/2007/022118s000\\_ChemR.pdf](https://www.accessdata.fda.gov/drugsatfda_docs/nda/2007/022118s000_ChemR.pdf)

•

79. ULTANE®

(sevoflurane) volatile liquid for inhalation

Learn about ULTANE®

•

80. VANIQA®

(eflornithine hydrochloride) cream, 13.9%

Learn about VANIQA®

•

81. ZEMPLAR® **oral BCS0**                      **1998**                      **90s0**

(paricalcitol) injection

(paricalcitol) capsules, for o use

Gastroenterology  
Description

•

82. [ACTIGALL®](#) oral BCS2 BCS4 1987 80s4

[\(ursodiol, USP\) capsules](#)

Learn about ACTIGALL®

[https://www.ema.europa.eu/en/documents/scientific-guideline/ursodeoxycholic-acid-capsule-250-mg-film-coated-tablet-150-mg-300-mg-450-mg-500-mg-600-mg-suspension/ml-250-mg/5-ml-product-specific-bioequivalence-guidance\\_en.pdf](https://www.ema.europa.eu/en/documents/scientific-guideline/ursodeoxycholic-acid-capsule-250-mg-film-coated-tablet-150-mg-300-mg-450-mg-500-mg-600-mg-suspension/ml-250-mg/5-ml-product-specific-bioequivalence-guidance_en.pdf)

•

83. [ASACOL® HD](#) oral BCS0 1987 80s0

[\(mesalamine\) delayed-release tablets, for o use](#)

Learn about ASACOL® HD

•

84. [BENTYL®](#)

[\(dicyclomine hydrochloride\) injection, for intramuscular use](#)

Learn about BENTYL®

•

85. [CANASA®](#)

[\(mesalamine\) rectal suppository](#)

Learn about CANASA®

•

86. [CARAFATE®](#) oral BCS0 1981 80s0

[\(sucralfate\) tablets](#)

[\(sucralfate\) suspension](#)

Learn about CARAFATE®

•

87. [DELZICOL®](#) oral BCS4 1987 80s4

[\(mesalamine\) delayed-release capsules, for o use](#)

Learn about DELZICOL®

•

88. [LINZESS®](#) oral BCS3 2012-3 10s3

[\(linaclotide\) capsules, for o use](#)

Learn about LINZESS®

[https://www.accessdata.fda.gov/drugsatfda\\_docs/nda/2012/202811Orig1s000ClinPharmR.pdf](https://www.accessdata.fda.gov/drugsatfda_docs/nda/2012/202811Orig1s000ClinPharmR.pdf)

•

89. [PYLERA®](#) oral BCS0 2006-0 00s0

[\(bismuth subcitrate potassium, metronidazole, tetracycline hydrochloride\) capsules, for o use](#)

Learn about PYLERA®

•

90. [URSO 250® and URSO FORTE®](#) oral BCS2 1987 80s2

[\(ursodiol\) tablets, for o use](#)

Learn about URSO 250® and URSO FORTE®



91. VIBERZI® oral BCS3 2015-3 10s3

(eluxadoline) tablets, for oral use, CIV

Learn about VIBERZI®

[https://www.accessdata.fda.gov/drugsatfda\\_docs/nda/2015/206940Orig1s000ClinPharmR.pdf](https://www.accessdata.fda.gov/drugsatfda_docs/nda/2015/206940Orig1s000ClinPharmR.pdf)

### GlaxoSmithKline products:

GlaxoSmithKline products available worldwide

<https://www.gsk.com/en-gb/products/products-a-z/>

#### **ANALYSIS EXCLUDES GSK PRODUCTS THAT ARE VACCINES!**

**Ambirix** hepatitis A (inactivated) and hepatitis B (rDNA) (HAB) vaccine (adsorbed)  
**Vaccines**

|                                                                                                                                                                       |                                                                                                                                 |                     |
|-----------------------------------------------------------------------------------------------------------------------------------------------------------------------|---------------------------------------------------------------------------------------------------------------------------------|---------------------|
| 1. Amoxil                                                                                                                                                             | amoxicillin                                                                                                                     | General medicines   |
| <b>Oral BCS1</b>                                                                                                                                                      | <a href="https://www.accessdata.fda.gov/drugsatfda_docs/nda/2017/04/068">10.1016/j.xphs.2017.04.068</a>                         | 1974 70s1           |
| 2. Anoro Ellipta                                                                                                                                                      | umeclidinium and vilanterol                                                                                                     | General medicines   |
| 3. Apretude                                                                                                                                                           | cabotegravir                                                                                                                    | Specialty medicines |
| 4. Arnuity Ellipta                                                                                                                                                    | Fluticasone                                                                                                                     | General medicines   |
| 5. Augmentin                                                                                                                                                          | amoxicillin/clavulanate potassium                                                                                               | General medicines   |
| <b>Oral BCS0</b>                                                                                                                                                      | <b>1984 80s0</b>                                                                                                                |                     |
| 6. Avamys / Veramyst                                                                                                                                                  | fluticasone furoate                                                                                                             | General medicines   |
| 7. Avodart/Avolve / Duodart                                                                                                                                           | dutasteride                                                                                                                     | General medicines   |
| <b>Oral BCS4</b>                                                                                                                                                      | <b>2001-4 00s4</b>                                                                                                              |                     |
| <a href="https://www.accessdata.fda.gov/drugsatfda_docs/label/2008/021319s015lbl.pdf">https://www.accessdata.fda.gov/drugsatfda_docs/label/2008/021319s015lbl.pdf</a> |                                                                                                                                 |                     |
| 8. Bactroban                                                                                                                                                          | mupirocin                                                                                                                       | General medicines   |
| 9. Beconase                                                                                                                                                           | beclomethasone                                                                                                                  | General medicines   |
| 10. Becotide/Becloforte                                                                                                                                               | beclomethasone dipropionate                                                                                                     | General medicines   |
| 11. Benlysta                                                                                                                                                          | belimumab                                                                                                                       | Specialty medicines |
| 12. Betnovate                                                                                                                                                         | betamethasone valerate                                                                                                          | General medicines   |
| <b>Bexsero</b>                                                                                                                                                        | <b>meningitis B</b>                                                                                                             | <b>Vaccines</b>     |
| 13. Blenrep                                                                                                                                                           | belantamab mafodotin                                                                                                            | Specialty medicines |
| <b>Boostrix</b><br>adsorbed                                                                                                                                           | <b>tetanus toxoid, reduced diphtheria toxoid and acellular pertussis vaccine,</b><br><b>Vaccines</b>                            |                     |
| <b>Boostrix IPV</b><br>(inactivated) vaccine                                                                                                                          | <b>Diphtheria, tetanus, pertussis (acellular, component) and poliomyelitis</b><br><b>(adsorbed, reduced antigen(s) content)</b> | <b>Vaccines</b>     |
| 14. Cabenuva                                                                                                                                                          | cabotegravir/rilpivirine                                                                                                        | Specialty medicines |

|                                                                           |                                                                                                                                                                                                                                                                                                                                                               |                     |
|---------------------------------------------------------------------------|---------------------------------------------------------------------------------------------------------------------------------------------------------------------------------------------------------------------------------------------------------------------------------------------------------------------------------------------------------------|---------------------|
| 15. Cabenuva/Vocabria + Rekambys medicines                                | Cabotegravir, rilpivirine                                                                                                                                                                                                                                                                                                                                     | Specialty           |
| <b>Cervarix adsorbed</b>                                                  | <b>human Papillomavirus vaccine (types 16, 18) - recombinant, adjuvanted, Vaccines</b>                                                                                                                                                                                                                                                                        |                     |
| 16. Combivir                                                              | lamivudine/ zidovudine                                                                                                                                                                                                                                                                                                                                        | Specialty medicines |
| <b>Oral BCS3</b>                                                          | <b>1997</b> <b>90s3</b>                                                                                                                                                                                                                                                                                                                                       |                     |
|                                                                           | <a href="https://www.ema.europa.eu/en/documents/assessment-report/lamivudine/zidovudine-teva-epar-public-assessment-report_en.pdf">https://www.ema.europa.eu/en/documents/assessment-report/lamivudine/zidovudine-teva-epar-public-assessment-report_en.pdf</a>                                                                                               |                     |
| 17. Cutivate                                                              | fluticasone propionate                                                                                                                                                                                                                                                                                                                                        | General medicines   |
| 18. Dermovate                                                             | clobetasol propionate                                                                                                                                                                                                                                                                                                                                         | General medicines   |
| 19. Dovato                                                                | dolutegravir/lamivudine                                                                                                                                                                                                                                                                                                                                       | Specialty medicines |
| <b>Oral BCS2</b>                                                          | <b>2019-2</b> <b>10s2</b>                                                                                                                                                                                                                                                                                                                                     |                     |
|                                                                           | <a href="https://www.ema.europa.eu/en/documents/scientific-guideline/draft-dolutegravir-film-coated-tablets-10-mg-25-mg-50-mg-product-specific-bioequivalence-guidance_en.pdf">https://www.ema.europa.eu/en/documents/scientific-guideline/draft-dolutegravir-film-coated-tablets-10-mg-25-mg-50-mg-product-specific-bioequivalence-guidance_en.pdf</a>       |                     |
|                                                                           | <a href="https://www.accessdata.fda.gov/drugsatfda_docs/nda/2019/211994Orig1s000ChemR.pdf">https://www.accessdata.fda.gov/drugsatfda_docs/nda/2019/211994Orig1s000ChemR.pdf</a>                                                                                                                                                                               |                     |
| 20. Duac                                                                  | clindamycin phosphate and benzoyl peroxide                                                                                                                                                                                                                                                                                                                    | General medicines   |
| 21. Eltroxin                                                              | Levothyroxin sodium                                                                                                                                                                                                                                                                                                                                           | General medicines   |
| <b>Oral BCS0</b>                                                          |                                                                                                                                                                                                                                                                                                                                                               |                     |
|                                                                           | <a href="https://www.ema.europa.eu/en/documents/scientific-guideline/levothyroxine-tablets-125-mcg-25-mcg-50-mcg-75-mcg-100-mcg-200-mcg-additional-strengths-within-range_en.pdf">https://www.ema.europa.eu/en/documents/scientific-guideline/levothyroxine-tablets-125-mcg-25-mcg-50-mcg-75-mcg-100-mcg-200-mcg-additional-strengths-within-range_en.pdf</a> |                     |
| <b>Engerixhepatitis B Vaccine (Recombinant)</b>                           |                                                                                                                                                                                                                                                                                                                                                               | <b>Vaccines</b>     |
| 22. Epivir                                                                | lamivudine                                                                                                                                                                                                                                                                                                                                                    | Specialty medicines |
| <b>Oral BCS3</b>                                                          | <b>1995</b> <b>90s3</b>                                                                                                                                                                                                                                                                                                                                       |                     |
| 23. Epzicom/ Kivexa                                                       | abacavir/ lamivudine                                                                                                                                                                                                                                                                                                                                          | Specialty medicines |
| <b>Oral BCS3</b>                                                          | <b>2004-3</b> <b>00s3</b>                                                                                                                                                                                                                                                                                                                                     |                     |
|                                                                           | <a href="https://extranet.who.int/pqweb/sites/default/files/HA662Part6v02.pdf">https://extranet.who.int/pqweb/sites/default/files/HA662Part6v02.pdf</a>                                                                                                                                                                                                       |                     |
| 24. Eumovate                                                              | clobetasone butyrate                                                                                                                                                                                                                                                                                                                                          | General medicines   |
| <b>Fendrixhepatitis B (rDNA) vaccine (adjuvanted, adsorbed)</b>           |                                                                                                                                                                                                                                                                                                                                                               | <b>Vaccines</b>     |
| 25. Flixonase/Flonase                                                     | fluticasone propionate                                                                                                                                                                                                                                                                                                                                        | General medicines   |
| 26. Flixotide / Flovent - Diskus / MDI                                    | fluticasone propionate                                                                                                                                                                                                                                                                                                                                        | General medicines   |
| 27. Flolan                                                                | epoprostenol                                                                                                                                                                                                                                                                                                                                                  | General medicines   |
| <b>Fluarix QIV</b>                                                        | <b>seasonal influenza vaccine (4 strain)</b>                                                                                                                                                                                                                                                                                                                  | <b>Vaccines</b>     |
| <b>Flulaval QIV</b>                                                       | <b>seasonal influenza vaccine (4 strain)</b>                                                                                                                                                                                                                                                                                                                  | <b>Vaccines</b>     |
| 28. Fortum                                                                | ceftazidime                                                                                                                                                                                                                                                                                                                                                   | General medicines   |
| <b>Havrix</b>                                                             | <b>hepatitis A vaccine, inactivated</b>                                                                                                                                                                                                                                                                                                                       | <b>Vaccines</b>     |
| 29. Hepsera                                                               | Adefovir                                                                                                                                                                                                                                                                                                                                                      | General medicines   |
| <b>Oral BCS3</b>                                                          | <b>2002-3</b> <b>00s3</b>                                                                                                                                                                                                                                                                                                                                     |                     |
|                                                                           | <a href="https://www.accessdata.fda.gov/drugsatfda_docs/pediatric/021449S011_Adefovir_Clin_pharm_Review_BPCA.pdf">https://www.accessdata.fda.gov/drugsatfda_docs/pediatric/021449S011_Adefovir_Clin_pharm_Review_BPCA.pdf</a>                                                                                                                                 |                     |
| <b>Hiberix haemophilus B conjugate vaccine (tetanus toxoid conjugate)</b> |                                                                                                                                                                                                                                                                                                                                                               | <b>Vaccines</b>     |
| 30. Imigran/ImiTrex FDT                                                   | sumatriptan succinate                                                                                                                                                                                                                                                                                                                                         | General medicines   |
| <b>Oral BCS3</b>                                                          | <b>1992</b> <b>90s3</b>                                                                                                                                                                                                                                                                                                                                       |                     |
|                                                                           | <a href="https://www.ema.europa.eu/en/documents/assessment-report/sumatriptan-galpharm-epar-public-assessment-report_en.pdf">https://www.ema.europa.eu/en/documents/assessment-report/sumatriptan-galpharm-epar-public-assessment-report_en.pdf</a>                                                                                                           |                     |
| 31. Imuran                                                                | Azathioprine                                                                                                                                                                                                                                                                                                                                                  | General medicines   |

|     |                                                                                                                                                                                                                                                                                                                                                         |                                        |             |                     |
|-----|---------------------------------------------------------------------------------------------------------------------------------------------------------------------------------------------------------------------------------------------------------------------------------------------------------------------------------------------------------|----------------------------------------|-------------|---------------------|
|     | <b>Oral BCS4</b>                                                                                                                                                                                                                                                                                                                                        | <b>1968</b>                            | <b>60s4</b> |                     |
|     | <a href="https://www.ema.europa.eu/en/documents/assessment-report/jayempi-h-c-005055-0000-epar-assessment-report_en.pdf">https://www.ema.europa.eu/en/documents/assessment-report/jayempi-h-c-005055-0000-epar-assessment-report_en.pdf</a>                                                                                                             |                                        |             |                     |
| 32. | Incruse                                                                                                                                                                                                                                                                                                                                                 | umeclidinium                           |             | General medicines   |
|     | Infanrix diphtheria and tetanus toxoids and acellular pertussis vaccine adsorbed Vaccines                                                                                                                                                                                                                                                               |                                        |             |                     |
|     | Infanrix IPV diphtheria, tetanus, pertussis (acellular, component) and poliomyelitis (inactivated) vaccine (adsorbed) Vaccines                                                                                                                                                                                                                          |                                        |             |                     |
| 33. | Jemperli                                                                                                                                                                                                                                                                                                                                                | dostarlimab                            |             | Specialty medicines |
| 34. | Juluca                                                                                                                                                                                                                                                                                                                                                  | dolutegravir/rilpivirine               |             | Specialty medicines |
|     | <b>Oral BCS2 BCS4</b>                                                                                                                                                                                                                                                                                                                                   | <b>2017-4</b>                          | <b>10s4</b> |                     |
|     | <a href="https://www.ema.europa.eu/en/documents/scientific-guideline/rilpivirine-film-coated-tablets-25-mg-product-specific-bioequivalence-guidance-first-version_en.pdf">https://www.ema.europa.eu/en/documents/scientific-guideline/rilpivirine-film-coated-tablets-25-mg-product-specific-bioequivalence-guidance-first-version_en.pdf</a>           |                                        |             |                     |
|     | <a href="https://www.ema.europa.eu/en/documents/scientific-guideline/draft-dolutegravir-film-coated-tablets-10-mg-25-mg-50-mg-product-specific-bioequivalence-guidance_en.pdf">https://www.ema.europa.eu/en/documents/scientific-guideline/draft-dolutegravir-film-coated-tablets-10-mg-25-mg-50-mg-product-specific-bioequivalence-guidance_en.pdf</a> |                                        |             |                     |
| 35. | Keppra                                                                                                                                                                                                                                                                                                                                                  | Levetiracetam                          |             | General medicines   |
|     | <b>Oral BCS1</b>                                                                                                                                                                                                                                                                                                                                        | <b>1999</b>                            | <b>90s1</b> |                     |
|     | <a href="https://www.fda.gov/media/89867/download">https://www.fda.gov/media/89867/download</a>                                                                                                                                                                                                                                                         |                                        |             |                     |
|     | Kinrix diphtheria and tetanus toxoids and acellular pertussis adsorbed and inactivated poliovirus vaccine Vaccines                                                                                                                                                                                                                                      |                                        |             |                     |
| 36. | Lacipil                                                                                                                                                                                                                                                                                                                                                 | Lacidipine                             |             | General medicines   |
|     | <b>Oral BCS0</b>                                                                                                                                                                                                                                                                                                                                        |                                        |             |                     |
| 37. | Lacticare - Family                                                                                                                                                                                                                                                                                                                                      | Lactic Acid                            |             | General medicines   |
| 38. | Lamictal                                                                                                                                                                                                                                                                                                                                                | lamotrigine                            |             | General medicines   |
|     | <b>Oral BCS2</b>                                                                                                                                                                                                                                                                                                                                        | <b>1994</b>                            | <b>90s2</b> |                     |
|     | <a href="https://www.accessdata.fda.gov/drugsatfda_docs/nda/2009/022251s000_ChemR.pdf">https://www.accessdata.fda.gov/drugsatfda_docs/nda/2009/022251s000_ChemR.pdf</a>                                                                                                                                                                                 |                                        |             |                     |
| 39. | Lanoxin                                                                                                                                                                                                                                                                                                                                                 | Digoxin                                |             | General medicines   |
|     | <b>Oral BCS4</b>                                                                                                                                                                                                                                                                                                                                        | <b>1954</b>                            | <b>50s4</b> |                     |
|     | <a href="https://doi.org/10.1021/acs.molpharmaceut.5b00278">10.1021/acs.molpharmaceut.5b00278</a>                                                                                                                                                                                                                                                       |                                        |             |                     |
| 40. | Levoxacin                                                                                                                                                                                                                                                                                                                                               | Levofloxacin                           |             | General medicines   |
|     | <b>Oral BCS1</b>                                                                                                                                                                                                                                                                                                                                        | <b>1996</b>                            | <b>90s1</b> |                     |
|     | <a href="https://extranet.who.int/pqweb/sites/default/files/documents/BE_levofloxacin_July2021.pdf">https://extranet.who.int/pqweb/sites/default/files/documents/BE_levofloxacin_July2021.pdf</a>                                                                                                                                                       |                                        |             |                     |
| 41. | Lexiva/ Telzir                                                                                                                                                                                                                                                                                                                                          | fosamprenavir                          |             | Specialty medicines |
|     | <b>Oral BCS0</b>                                                                                                                                                                                                                                                                                                                                        | <b>2003-0</b>                          | <b>00s0</b> |                     |
| 42. | Lovaza                                                                                                                                                                                                                                                                                                                                                  | omega-3 acid ethyl esters              |             | General medicines   |
|     | <b>Oral BCS0</b>                                                                                                                                                                                                                                                                                                                                        | <b>2004-0</b>                          | <b>00s0</b> |                     |
| 43. | Malarone                                                                                                                                                                                                                                                                                                                                                | atovaquone and proguanil hydrochloride |             | General medicines   |
|     | <b>Oral BCS2 BCS4</b>                                                                                                                                                                                                                                                                                                                                   | <b>2000-4</b>                          | <b>00s4</b> |                     |
|     | <a href="https://www.accessdata.fda.gov/drugsatfda_docs/label/2008/020500s010lbl.pdf">https://www.accessdata.fda.gov/drugsatfda_docs/label/2008/020500s010lbl.pdf</a>                                                                                                                                                                                   |                                        |             |                     |
|     | Menitorix combined Haemophilus influenzae type b and Neisseria meningitidis group C (Hib-MenC) conjugate vaccines Vaccines                                                                                                                                                                                                                              |                                        |             |                     |
|     | Menjugate meningitis C Vaccines                                                                                                                                                                                                                                                                                                                         |                                        |             |                     |
|     | Menveo meningitis ACWY Vaccines                                                                                                                                                                                                                                                                                                                         |                                        |             |                     |
| 44. | Mepron                                                                                                                                                                                                                                                                                                                                                  | atovaquone                             |             | General medicines   |
|     | <b>Oral BCS2 BCS4</b>                                                                                                                                                                                                                                                                                                                                   | <b>1992</b>                            | <b>90s4</b> |                     |
|     | <a href="https://www.accessdata.fda.gov/drugsatfda_docs/label/2008/020500s010lbl.pdf">https://www.accessdata.fda.gov/drugsatfda_docs/label/2008/020500s010lbl.pdf</a>                                                                                                                                                                                   |                                        |             |                     |

45. Naramig/Amerge naratriptan hydrochloride General medicines  
**Oral BCS1** **1998** **90s1**  
[https://www.accessdata.fda.gov/drugsatfda\\_docs/label/2012/020763s008s009lb.pdf](https://www.accessdata.fda.gov/drugsatfda_docs/label/2012/020763s008s009lb.pdf)
46. Nucala mepolizumab Specialty medicines
47. Paxil / Seroxat paroxetine hydrochloride General medicines  
**Oral BCS1** **1991** **90s1**  
[https://www.accessdata.fda.gov/drugsatfda\\_docs/nda/2013/204516Orig1s000ClinPharmR.pdf](https://www.accessdata.fda.gov/drugsatfda_docs/nda/2013/204516Orig1s000ClinPharmR.pdf)
- Pediarix diphtheria and tetanus toxoids and acellular pertussis adsorbed, hepatitis B (recombinant) and inactivated poliovirus vaccine combined Vaccines
- Priorix measles, mumps and rubella vaccine (live attenuated virus) Vaccines
- Priorix-Tetra measles, mumps, rubella, varicella (chicken pox) Vaccines
48. Relenza zanamivir General medicines
49. Relvar/Breo Fluticasone furoate/vilanterol General medicines
50. Requip ropinirole hydrochloride General medicines  
**Oral BCS1** **1997** **90s1**  
[https://www.accessdata.fda.gov/drugsatfda\\_docs/label/2008/020658s018s020s021lbl.pdf](https://www.accessdata.fda.gov/drugsatfda_docs/label/2008/020658s018s020s021lbl.pdf)
51. Retrovir zidovudine Specialty medicines  
**Oral BCS3** **1987** **80s3**  
[https://www.ema.europa.eu/en/documents/assessment-report/lamivudine/zidovudine-teva-epar-public-assessment-report\\_en.pdf](https://www.ema.europa.eu/en/documents/assessment-report/lamivudine/zidovudine-teva-epar-public-assessment-report_en.pdf)
- Rotarix human rotavirus vaccine, live attenuated Vaccines
52. Rukobia fostemsavir Specialty medicines  
**Oral BCS0** **2020-0** **20s0**
53. Rythmol propafenone hydrochloride General medicines  
**Oral BCS0**
54. Selzentry/ Celsentri maraviroc Specialty medicines  
**Oral BCS3** **2007-3** **00s3**  
[https://www.ema.europa.eu/en/documents/variation-report/celsentri-h-c-000811-x-0046-g-epar-assessment-report-variation\\_en.pdf](https://www.ema.europa.eu/en/documents/variation-report/celsentri-h-c-000811-x-0046-g-epar-assessment-report-variation_en.pdf)
55. Septrin Cotrimoxazole General medicines  
**Oral BCS0**
56. Seretide / Advair - Diskus / MDI salmeterol xinafoate, fluticasone propionate General medicines
57. Serevent - Diskus / MDI salmeterol xinafoate General medicines
- Shingrix Zoster Vaccine Recombinant, Adjuvanted Vaccines
- Synflorix pneumococcal polysaccharide conjugate vaccine (adsorbed) Vaccines
58. Tivicay dolutegravir Specialty medicines  
**Oral BCS2 BCS4** **2013-4** **10s4**  
[https://www.ema.europa.eu/en/documents/scientific-guideline/draft-dolutegravir-film-coated-tablets-10-mg-25-mg-50-mg-product-specific-bioequivalence-guidance\\_en.pdf](https://www.ema.europa.eu/en/documents/scientific-guideline/draft-dolutegravir-film-coated-tablets-10-mg-25-mg-50-mg-product-specific-bioequivalence-guidance_en.pdf)
59. Toctino Alitretinoin General medicines  
**Oral BCS0** **1999** **90s0**

|     |                         |                                                                                                                                                                                                                                                                                                                                                         |                     |
|-----|-------------------------|---------------------------------------------------------------------------------------------------------------------------------------------------------------------------------------------------------------------------------------------------------------------------------------------------------------------------------------------------------|---------------------|
| 60. | Trelegy - Ellipta       | fluticasone furoate, umeclidinium, and vilanterol inhalation powder                                                                                                                                                                                                                                                                                     | General medicines   |
| 61. | Triumeq                 | dolutegravir/ abacavir/ lamivudine                                                                                                                                                                                                                                                                                                                      | Specialty medicines |
|     | <b>Oral BCS2 BCS4</b>   | <b>2014-4</b>                                                                                                                                                                                                                                                                                                                                           | <b>10s4</b>         |
|     |                         | <a href="https://www.ema.europa.eu/en/documents/scientific-guideline/draft-dolutegravir-film-coated-tablets-10-mg-25-mg-50-mg-product-specific-bioequivalence-guidance_en.pdf">https://www.ema.europa.eu/en/documents/scientific-guideline/draft-dolutegravir-film-coated-tablets-10-mg-25-mg-50-mg-product-specific-bioequivalence-guidance_en.pdf</a> |                     |
| 62. | Trizivir                | abacavir/ lamivudine/ zidovudine                                                                                                                                                                                                                                                                                                                        | Specialty medicines |
|     | <b>Oral BCS3</b>        | <b>2000-3</b>                                                                                                                                                                                                                                                                                                                                           | <b>00s3</b>         |
|     |                         | <a href="https://extranet.who.int/pqweb/sites/default/files/HA662Part6v02.pdf">https://extranet.who.int/pqweb/sites/default/files/HA662Part6v02.pdf</a>                                                                                                                                                                                                 |                     |
|     |                         | <a href="https://www.ema.europa.eu/en/documents/assessment-report/lamivudine/zidovudine-teva-epar-public-assessment-report_en.pdf">https://www.ema.europa.eu/en/documents/assessment-report/lamivudine/zidovudine-teva-epar-public-assessment-report_en.pdf</a>                                                                                         |                     |
|     | <b>Twinrix</b>          | <b>combined hepatitis A (inactivated virus) and hepatitis B vaccine (genetically derived surface antigen)</b>                                                                                                                                                                                                                                           | <b>Vaccines</b>     |
| 63. | Valtrex                 | valaciclovir hydrochloride                                                                                                                                                                                                                                                                                                                              | General medicines   |
|     | <b>Oral BCS3</b>        | <b>1995</b>                                                                                                                                                                                                                                                                                                                                             | <b>90s3</b>         |
|     |                         | <a href="https://www.fda.gov/media/71296/download">https://www.fda.gov/media/71296/download</a>                                                                                                                                                                                                                                                         |                     |
|     | <b>Varilrix</b>         | <b>varicella (chicken pox)</b>                                                                                                                                                                                                                                                                                                                          | <b>Vaccines</b>     |
| 64. | Ventolin - Diskus / MDI | Salbutamol                                                                                                                                                                                                                                                                                                                                              | General medicines   |
| 65. | Viracept                | nelfinavir                                                                                                                                                                                                                                                                                                                                              | Specialty medicines |
|     | <b>Oral BCS0</b>        | <b>1997</b>                                                                                                                                                                                                                                                                                                                                             | <b>90s0</b>         |
| 66. | Vocabria                | cabotegravir                                                                                                                                                                                                                                                                                                                                            | Specialty medicines |
|     | <b>Oral BCS2</b>        | <b>2021-2</b>                                                                                                                                                                                                                                                                                                                                           | <b>20s2</b>         |
|     |                         | <a href="https://www.ema.europa.eu/en/documents/assessment-report/vocabria-epar-public-assessment-report_en.pdf">https://www.ema.europa.eu/en/documents/assessment-report/vocabria-epar-public-assessment-report_en.pdf</a>                                                                                                                             |                     |
| 67. | Volibris (Ambrisentan)  | ambrisentan                                                                                                                                                                                                                                                                                                                                             | General medicines   |
|     | <b>Oral BCS2</b>        | <b>2007-2</b>                                                                                                                                                                                                                                                                                                                                           | <b>00s2</b>         |
|     |                         | <a href="https://www.ema.europa.eu/en/documents/assessment-report/ambrisentan-mylan-epar-public-assessment-report_en.pdf">https://www.ema.europa.eu/en/documents/assessment-report/ambrisentan-mylan-epar-public-assessment-report_en.pdf</a>                                                                                                           |                     |
| 68. | Wellbutrin              | bupropion hydrochloride                                                                                                                                                                                                                                                                                                                                 | General medicines   |
|     | <b>Oral BCS1</b>        | <b>1985</b>                                                                                                                                                                                                                                                                                                                                             | <b>80s1</b>         |
|     |                         | <a href="https://www.accessdata.fda.gov/drugsatfda_docs/nda/2013/020358Orig1s053.pdf">https://www.accessdata.fda.gov/drugsatfda_docs/nda/2013/020358Orig1s053.pdf</a>                                                                                                                                                                                   |                     |
| 69. | Xevudy                  | sotrovimab                                                                                                                                                                                                                                                                                                                                              | Specialty medicines |
| 70. | Xyzal                   | Levocetirizine                                                                                                                                                                                                                                                                                                                                          | General medicines   |
|     | <b>Oral BCS3</b>        | <b>1995</b>                                                                                                                                                                                                                                                                                                                                             | <b>90s3</b>         |
|     |                         | <a href="https://www.ema.europa.eu/en/documents/referral/gvk-biosciences-article-31-referral-gvk-biosciences-final-assessment-report-following-re-examination_en.pdf">https://www.ema.europa.eu/en/documents/referral/gvk-biosciences-article-31-referral-gvk-biosciences-final-assessment-report-following-re-examination_en.pdf</a>                   |                     |
| 71. | Zagallo                 | Dutasteride                                                                                                                                                                                                                                                                                                                                             | General medicines   |
|     | <b>Oral BCS4</b>        | <b>2001-4</b>                                                                                                                                                                                                                                                                                                                                           | <b>00s4</b>         |
|     |                         | <a href="https://www.accessdata.fda.gov/drugsatfda_docs/label/2008/021319s015lbl.pdf">https://www.accessdata.fda.gov/drugsatfda_docs/label/2008/021319s015lbl.pdf</a>                                                                                                                                                                                   |                     |
| 72. | Zeffix                  | lamivudine                                                                                                                                                                                                                                                                                                                                              | General medicines   |
|     | <b>Oral BCS3</b>        | <b>1995</b>                                                                                                                                                                                                                                                                                                                                             | <b>90s3</b>         |
|     |                         | <a href="https://www.ema.europa.eu/en/documents/assessment-report/lamivudine/zidovudine-teva-epar-public-assessment-report_en.pdf">https://www.ema.europa.eu/en/documents/assessment-report/lamivudine/zidovudine-teva-epar-public-assessment-report_en.pdf</a>                                                                                         |                     |
| 73. | Zejula                  | niraparib                                                                                                                                                                                                                                                                                                                                               | Specialty medicines |
|     | <b>Oral BCS2</b>        | <b>2017-2</b>                                                                                                                                                                                                                                                                                                                                           | <b>10s2</b>         |

[https://www.ema.europa.eu/en/documents/assessment-report/zejula-epar-public-assessment-report\\_en.pdf](https://www.ema.europa.eu/en/documents/assessment-report/zejula-epar-public-assessment-report_en.pdf)

|             |                         |             |             |                                                                                                                                                                                                                                                                                                                                       |
|-------------|-------------------------|-------------|-------------|---------------------------------------------------------------------------------------------------------------------------------------------------------------------------------------------------------------------------------------------------------------------------------------------------------------------------------------|
| 74. Zentel  | Albendazole             |             |             | General medicines                                                                                                                                                                                                                                                                                                                     |
|             | <b>Oral BCS2 BCS4</b>   | <b>1996</b> | <b>90s4</b> |                                                                                                                                                                                                                                                                                                                                       |
|             |                         |             |             | <a href="https://www.accessdata.fda.gov/drugsatfda_docs/label/2009/020666s005s006lbl.pdf">https://www.accessdata.fda.gov/drugsatfda_docs/label/2009/020666s005s006lbl.pdf</a>                                                                                                                                                         |
| 75. Ziagen  | abacavir                |             |             | Specialty medicines                                                                                                                                                                                                                                                                                                                   |
|             | <b>Oral BCS3</b>        | <b>1998</b> | <b>90s3</b> |                                                                                                                                                                                                                                                                                                                                       |
|             |                         |             |             | <a href="https://extranet.who.int/pqweb/sites/default/files/HA662Part6v02.pdf">https://extranet.who.int/pqweb/sites/default/files/HA662Part6v02.pdf</a>                                                                                                                                                                               |
| 76. Zinacef | cefuroxime              |             |             | General medicines                                                                                                                                                                                                                                                                                                                     |
|             | <b>Oral BCS0</b>        | <b>1983</b> | <b>80s0</b> |                                                                                                                                                                                                                                                                                                                                       |
| 77. Zovirax | aciclovir               |             |             | General medicines                                                                                                                                                                                                                                                                                                                     |
| 78. Zyban   | bupropion hydrochloride |             |             | General medicines                                                                                                                                                                                                                                                                                                                     |
|             | <b>Oral BCS1</b>        | <b>1985</b> | <b>80s1</b> |                                                                                                                                                                                                                                                                                                                                       |
|             |                         |             |             | <a href="https://www.accessdata.fda.gov/drugsatfda_docs/nda/2013/020358Orig1s053.pdf">https://www.accessdata.fda.gov/drugsatfda_docs/nda/2013/020358Orig1s053.pdf</a>                                                                                                                                                                 |
| 79. Zyloric | Allopurinol             |             |             | General medicines                                                                                                                                                                                                                                                                                                                     |
|             | <b>Oral BCS4</b>        | <b>1966</b> | <b>60s4</b> |                                                                                                                                                                                                                                                                                                                                       |
|             |                         |             |             | <a href="https://www.ema.europa.eu/en/documents/assessment-report/duzallo-epar-public-assessment-report_en.pdf">https://www.ema.europa.eu/en/documents/assessment-report/duzallo-epar-public-assessment-report_en.pdf</a>                                                                                                             |
| 80. Zyrtec  | cetirizine              |             |             | General medicines                                                                                                                                                                                                                                                                                                                     |
|             | <b>Oral BCS3</b>        | <b>1995</b> | <b>90s3</b> |                                                                                                                                                                                                                                                                                                                                       |
|             |                         |             |             | <a href="https://www.ema.europa.eu/en/documents/referral/gvk-biosciences-article-31-referral-gvk-biosciences-final-assessment-report-following-re-examination_en.pdf">https://www.ema.europa.eu/en/documents/referral/gvk-biosciences-article-31-referral-gvk-biosciences-final-assessment-report-following-re-examination_en.pdf</a> |

### Johnson & Johnson (Janssen) products:

Janssen products (US market)

<https://www.janssen.com/us/our-products>

1. BALVERSA™ erdafitinib **oral BCS1 2019-1 20s1**  
[https://www.accessdata.fda.gov/drugsatfda\\_docs/nda/2019/212018Orig1s000ChemR.pdf](https://www.accessdata.fda.gov/drugsatfda_docs/nda/2019/212018Orig1s000ChemR.pdf)
2. CARVYKTI™ ciltacabtagene autoleucel; cilta-cel
3. CONCERTA® methylphenidate HCl **oral BCS1 1955 50s1**  
[https://www.ema.europa.eu/en/documents/referral/methylphenidate-hexal-article-29-referral-assessment-report\\_en.pdf](https://www.ema.europa.eu/en/documents/referral/methylphenidate-hexal-article-29-referral-assessment-report_en.pdf)
4. DARZALEX FASPRO™ daratumumab and hyaluronidase-fihj
5. DARZALEX® daratumumab
6. DITROPAN XL® oxybutynin chloride **oral BCS0 1975 70s0**
7. EDURANT® rilpivirine **oral BCS2 BCS4 2011-4 10s4**
8. ELMIRON® pentosan polysulfate sodium **oral BCS3 1996 90s3**  
[https://www.ema.europa.eu/en/documents/assessment-report/elmiron-epar-public-assessment-report\\_en.pdf](https://www.ema.europa.eu/en/documents/assessment-report/elmiron-epar-public-assessment-report_en.pdf)

9. ERLEADA™ apalutamide 60mg tablets **oral BCS2 2018-2 10s2**  
[https://www.accessdata.fda.gov/drugsatfda\\_docs/nda/2018/210951Orig1s000ChemR.pdf](https://www.accessdata.fda.gov/drugsatfda_docs/nda/2018/210951Orig1s000ChemR.pdf)
10. HALDOL® haloperidol
11. HALDOL® Decanoate  
(haloperidol decanoate)
12. IMBRUVICA® ibrutinib **oral BCS2 2013-2 10s2**  
[https://www.accessdata.fda.gov/drugsatfda\\_docs/nda/2018/210563Orig1s000\\_210563Orig2s000ChemR.pdf](https://www.accessdata.fda.gov/drugsatfda_docs/nda/2018/210563Orig1s000_210563Orig2s000ChemR.pdf)
13. INFLIXIMAB
14. INTELENCE® etravirine **oral BCS4 2008-4 00s4**  
[https://www.ema.europa.eu/en/documents/assessment-report/intelence-epar-public-assessment-report\\_en.pdf](https://www.ema.europa.eu/en/documents/assessment-report/intelence-epar-public-assessment-report_en.pdf)
15. INVEGA HAFYERA™ paliperidone palmitate
16. INVEGA SUSTENNA® paliperidone palmitate
17. INVEGA TRINZA® paliperidone palmitate
18. INVEGA® paliperidone **oral BCS4 2006-4 00s4**  
[https://www.accessdata.fda.gov/drugsatfda\\_docs/label/2010/021999s018lbl.pdf](https://www.accessdata.fda.gov/drugsatfda_docs/label/2010/021999s018lbl.pdf)
19. INVOKAMET® XR canagliflozin and metformin HCl extended-release **oral BCS4 2014-4 10s4**  
[https://www.accessdata.fda.gov/drugsatfda\\_docs/nda/2014/204353Orig1s000ClinPharmR.pdf](https://www.accessdata.fda.gov/drugsatfda_docs/nda/2014/204353Orig1s000ClinPharmR.pdf)
20. INVOKAMET® canagliflozin and metformin HCl **oral BCS4 2014-4 10s4**  
[https://www.accessdata.fda.gov/drugsatfda\\_docs/nda/2014/204353Orig1s000ClinPharmR.pdf](https://www.accessdata.fda.gov/drugsatfda_docs/nda/2014/204353Orig1s000ClinPharmR.pdf)
21. INVOKANA® canagliflozin **oral BCS4 2013-4 10s4**  
[https://www.accessdata.fda.gov/drugsatfda\\_docs/nda/2014/204353Orig1s000ClinPharmR.pdf](https://www.accessdata.fda.gov/drugsatfda_docs/nda/2014/204353Orig1s000ClinPharmR.pdf)
22. OPSUMIT® macitentan **oral BCS2 2013-2 10s2**  
[https://www.accessdata.fda.gov/drugsatfda\\_docs/nda/2013/204410Orig1s000ClinPharmR.pdf](https://www.accessdata.fda.gov/drugsatfda_docs/nda/2013/204410Orig1s000ClinPharmR.pdf)
23. PONVORY™ Ponesimod **oral BCS4 2021-4 20s4**  
[https://www.accessdata.fda.gov/drugsatfda\\_docs/nda/2021/213498Orig1s000ChemR.pdf](https://www.accessdata.fda.gov/drugsatfda_docs/nda/2021/213498Orig1s000ChemR.pdf)
24. PREZCOBIX® darunavir 800 mg/ cobicistat 150 mg **oral BCS2 2015-2 10s2**  
[https://www.ema.europa.eu/en/documents/assessment-report/darunavir-krka-epar-public-assessment-report\\_en.pdf](https://www.ema.europa.eu/en/documents/assessment-report/darunavir-krka-epar-public-assessment-report_en.pdf)  
[https://www.ema.europa.eu/en/documents/scientific-guideline/draft-elvitegravir/cobicistat/emtricitabine/tenofovir-disoproxil-film-coated-tablets-150-mg/150-mg/200-mg/245-mg-product-specific-bioequivalence-guidance\\_en.pdf](https://www.ema.europa.eu/en/documents/scientific-guideline/draft-elvitegravir/cobicistat/emtricitabine/tenofovir-disoproxil-film-coated-tablets-150-mg/150-mg/200-mg/245-mg-product-specific-bioequivalence-guidance_en.pdf)

25. PREZISTA® darunavir **oral BCS2**  
 2006-2 00s2  
[https://www.ema.europa.eu/en/documents/assessment-report/darunavir-krka-epar-public-assessment-report\\_en.pdf](https://www.ema.europa.eu/en/documents/assessment-report/darunavir-krka-epar-public-assessment-report_en.pdf)
26. PROCREDIT® Epoetin alfa
27. RAZADYNE® ER galantamine HBrq **oral BCS0**  
 2001-0 00s0
28. REMICADE® infliximab
29. RISPERDAL CONSTA® risperidone
30. RISPERDAL® Oral Solution risperidone **oral BCS2**  
 1993 90s2
31. RISPERDAL® Tablets risperidone **oral BCS2**  
 1993 90s2  
[https://www.accessdata.fda.gov/drugsatfda\\_docs/label/2005/020272s042,020588s030,021444s016,021346s010lbl.pdf](https://www.accessdata.fda.gov/drugsatfda_docs/label/2005/020272s042,020588s030,021444s016,021346s010lbl.pdf)
32. RYBREVA™ amivantamab-vmjw)
33. SIMPONI ARIA®
34. SIMPONI® golimumab
35. SIRTURO® Tablets bedaquiline **oral BCS2**  
 2012-2 10s2  
[https://www.accessdata.fda.gov/drugsatfda\\_docs/nda/2012/204384Orig1s000ClinPharmR.pdf](https://www.accessdata.fda.gov/drugsatfda_docs/nda/2012/204384Orig1s000ClinPharmR.pdf)
36. SPORANOX® Capsules itraconazole **oral BCS2**  
 1992 90s2  
[https://www.accessdata.fda.gov/drugsatfda\\_docs/nda/2010/022484Orig1s000ClinPharmR.pdf](https://www.accessdata.fda.gov/drugsatfda_docs/nda/2010/022484Orig1s000ClinPharmR.pdf)
37. SPORANOX® Oral Solution itraconazole **oral BCS2**  
 1992 90s2  
[https://www.accessdata.fda.gov/drugsatfda\\_docs/nda/2010/022484Orig1s000ClinPharmR.pdf](https://www.accessdata.fda.gov/drugsatfda_docs/nda/2010/022484Orig1s000ClinPharmR.pdf)
38. SPRAVATO® esketamine nasal spray, CIII
39. STELARA® ustekinumab
40. SYMTUZA® (darunavir/cobicistat/emtricitabine/tenofovir alafenamide tablets 800mg/150mg/200mg/10mg) **oral BCS2**  
 2018-2 10s2
41. TECVAYLI™ teclistamab-cqyv
42. TOPAMAX® topiramate **oral BCS1**  
 1996 90s1
43. TRACLEER® bosentan **oral BCS2**  
 2001-2 00s2  
[https://www.ema.europa.eu/en/documents/variation-report/tracleer-h-c-401-x-0039-epar-assessment-report-extension\\_en.pdf](https://www.ema.europa.eu/en/documents/variation-report/tracleer-h-c-401-x-0039-epar-assessment-report-extension_en.pdf)



44. TREMFYA® guselkumab
45. ULTRACET® tramadol hydrochloride/acetaminophen **oral BCS1 BCS3**  
2001-3 00s3  
[https://www.accessdata.fda.gov/drugsatfda\\_docs/label/2009/020281s032s033lbl.pdf](https://www.accessdata.fda.gov/drugsatfda_docs/label/2009/020281s032s033lbl.pdf)
46. ULTRAM® tramadol hydrochloride **oral BCS1 BCS3**  
1995 90s3  
[https://www.accessdata.fda.gov/drugsatfda\\_docs/label/2009/020281s032s033lbl.pdf](https://www.accessdata.fda.gov/drugsatfda_docs/label/2009/020281s032s033lbl.pdf)
47. UPTRAVI® selexipag **oral BCS2 BCS4**  
2015-5 10s4  
[https://www.ema.europa.eu/en/documents/assessment-report/uptravi-epar-public-assessment-report\\_en.pdf](https://www.ema.europa.eu/en/documents/assessment-report/uptravi-epar-public-assessment-report_en.pdf)
48. VELETRI® epoprostenol
49. VENTAVIS® iloprost)
50. VERMOX™ CHEWABLE mebendazole chewable tablets **oral BCS0**  
1974 70s0
51. XARELTO® rivaroxaban tablets **oral BCS2**  
2011-2 10s2  
[https://www.ema.europa.eu/en/documents/variation-report/xarelto-h-c-944-x-0010-epar-assessment-report-extension\\_en.pdf](https://www.ema.europa.eu/en/documents/variation-report/xarelto-h-c-944-x-0010-epar-assessment-report-extension_en.pdf)
52. YONDELIS® trabectedin
53. ZAVESCA® miglustat **oral BCS0**  
2003-0 00s0  
[https://www.ema.europa.eu/en/documents/scientific-guideline/miglustat-hard-capsules-100-mg-product-specific-bioequivalence-guidance\\_en.pdf](https://www.ema.europa.eu/en/documents/scientific-guideline/miglustat-hard-capsules-100-mg-product-specific-bioequivalence-guidance_en.pdf)
54. ZYTIGA® abiraterone acetate **oral BCS2 BCS4**  
2011-4 10s4  
[https://www.ema.europa.eu/en/documents/scientific-guideline/draft-abiraterone-tablets-250-mg-500-mg-product-specific-bioequivalence-guidance-revision-1\\_en.pdf](https://www.ema.europa.eu/en/documents/scientific-guideline/draft-abiraterone-tablets-250-mg-500-mg-product-specific-bioequivalence-guidance-revision-1_en.pdf)

### Sanofi products:

Products on the US market

<https://www.sanofi.us/en/products-and-resources/prescription-products>

1. Adlyxin® (lixisenatide injection)
2. ADMELOG® (insulin lispro injection) 100 Units/mL
3. Aldurazyme® (laronidase)
4. Alprolix® [Coagulation Factor IX (Recombinant), Fc Fusion Protein]
5. Amaryl® (glimepiride tablets) **oral BCS2 BCS4** 1995 90s4  
[https://www.ema.europa.eu/en/documents/referral/glimepirida-parke-davis-article-294-referral-assessment-report\\_en.pdf](https://www.ema.europa.eu/en/documents/referral/glimepirida-parke-davis-article-294-referral-assessment-report_en.pdf)
6. Ambien® (zolpidem tartrate) tablets **oral BCS1** 1992 90s1

<https://doi.org/10.1021/acs.molpharmaceut.5b00076>

- |                                                                                              |                                                                                                                                                                                                                                                                                                                                                             |      |
|----------------------------------------------------------------------------------------------|-------------------------------------------------------------------------------------------------------------------------------------------------------------------------------------------------------------------------------------------------------------------------------------------------------------------------------------------------------------|------|
| 7. Ambien CR® (zolpidem tartrate) extended-release tablets                                   | oral BCS1 2005-1                                                                                                                                                                                                                                                                                                                                            | 00s1 |
| 8. Apidra® (insulin glulisine injection) 100 Units/mL                                        |                                                                                                                                                                                                                                                                                                                                                             |      |
| 9. Arava® Tablets (leflunomide)                                                              | oral BCS2 1998                                                                                                                                                                                                                                                                                                                                              | 90s2 |
| 10. AUBAGIO® (teriflunomide)                                                                 | oral BCS2 2012-2                                                                                                                                                                                                                                                                                                                                            | 10s2 |
|                                                                                              | <a href="https://www.ema.europa.eu/en/documents/assessment-report/aubagio-epar-public-assessment-report_en.pdf">https://www.ema.europa.eu/en/documents/assessment-report/aubagio-epar-public-assessment-report_en.pdf</a>                                                                                                                                   |      |
| 11. Avalide® (irbesartan-hydrochlorothiazide)                                                | oral BCS2 BCS4 1997                                                                                                                                                                                                                                                                                                                                         | 90s4 |
|                                                                                              | <a href="https://www.accessdata.fda.gov/drugsatfda_docs/label/2011/020757s0551bl.pdf">https://www.accessdata.fda.gov/drugsatfda_docs/label/2011/020757s0551bl.pdf</a>                                                                                                                                                                                       |      |
| 12. Avapro® (irbesartan)                                                                     | oral BCS2 BCS4 1997                                                                                                                                                                                                                                                                                                                                         | 90s4 |
| 13. Cablivi® (caplacizumab-yhdp)                                                             |                                                                                                                                                                                                                                                                                                                                                             |      |
| 14. Caprelsa® (vandetanib) Tablets                                                           | oral BCS2 2011-2                                                                                                                                                                                                                                                                                                                                            | 10s2 |
|                                                                                              | <a href="https://www.accessdata.fda.gov/drugsatfda_docs/nda/2011/022405Orig1s000ChemR.pdf">https://www.accessdata.fda.gov/drugsatfda_docs/nda/2011/022405Orig1s000ChemR.pdf</a>                                                                                                                                                                             |      |
| 15. Cerdelga® (eliglustat) capsules                                                          | oral BCS3 2014-3                                                                                                                                                                                                                                                                                                                                            | 10s3 |
|                                                                                              | <a href="https://www.ema.europa.eu/en/documents/assessment-report/cerdelga-epar-public-assessment-report_en.pdf">https://www.ema.europa.eu/en/documents/assessment-report/cerdelga-epar-public-assessment-report_en.pdf</a>                                                                                                                                 |      |
| 16. Cerezyme® (imiglucerase) for injection                                                   |                                                                                                                                                                                                                                                                                                                                                             |      |
| 17. Clolar® (clofarabine injection)                                                          |                                                                                                                                                                                                                                                                                                                                                             |      |
| 18. Dupixent® (dupilumab) Injection                                                          |                                                                                                                                                                                                                                                                                                                                                             |      |
| 19. Elitek® (rasburicase)                                                                    |                                                                                                                                                                                                                                                                                                                                                             |      |
| 20. Elocate® [Antihemophilic Factor (Recombinant), Fc Fusion Protein]                        |                                                                                                                                                                                                                                                                                                                                                             |      |
| 21. Eloxatin® (oxaliplatin injection)                                                        |                                                                                                                                                                                                                                                                                                                                                             |      |
| 22. ENJAYMO™ (sutimlimab-jome) injection, for intravenous use                                |                                                                                                                                                                                                                                                                                                                                                             |      |
| 23. Fabrazyme® (agalsidase beta)                                                             |                                                                                                                                                                                                                                                                                                                                                             |      |
| 24. Ferrlecit® (sodium ferric gluconate complex in sucrose injection)                        |                                                                                                                                                                                                                                                                                                                                                             |      |
| 25. Flomax® (tamsulosin HCl)                                                                 | oral BCS0 1997                                                                                                                                                                                                                                                                                                                                              | 90s0 |
| 26. Hectorol® (doxercalciferol)                                                              |                                                                                                                                                                                                                                                                                                                                                             |      |
| 27. Insulin Glargine injection 100 Units/mL (U-100)                                          |                                                                                                                                                                                                                                                                                                                                                             |      |
| 28. Jevtana® (cabazitaxel) Injection                                                         |                                                                                                                                                                                                                                                                                                                                                             |      |
| 29. Kevzara® (sarilumab) Injection                                                           |                                                                                                                                                                                                                                                                                                                                                             |      |
| 30. Lantus® (insulin glargine injection) 100 Units/mL                                        |                                                                                                                                                                                                                                                                                                                                                             |      |
| 31. LEMTRADA® (alemtuzumab)                                                                  |                                                                                                                                                                                                                                                                                                                                                             |      |
| 32. Lovenox® (enoxaparin sodium injection)                                                   |                                                                                                                                                                                                                                                                                                                                                             |      |
| 33. Lumizyme® (alglucosidase alfa)                                                           |                                                                                                                                                                                                                                                                                                                                                             |      |
| 34. Mozobil® (plerixafor) injection                                                          |                                                                                                                                                                                                                                                                                                                                                             |      |
| 35. Multaq® (dronedarone)                                                                    | oral BCS2 BCS4 2009-4                                                                                                                                                                                                                                                                                                                                       | 00s4 |
|                                                                                              | <a href="https://www.ema.europa.eu/en/documents/scientific-guideline/draft-dronedarone-film-coated-tablets-400-mg-product-specific-bioequivalence-guidance-first-version_en.pdf">https://www.ema.europa.eu/en/documents/scientific-guideline/draft-dronedarone-film-coated-tablets-400-mg-product-specific-bioequivalence-guidance-first-version_en.pdf</a> |      |
| 36. Nexviazyme™ (avalglucosidase alfa-ngpt)                                                  |                                                                                                                                                                                                                                                                                                                                                             |      |
| 37. Plavix® (clopidogrel bisulfate)                                                          | oral BCS2 BCS4 1997                                                                                                                                                                                                                                                                                                                                         | 90s4 |
|                                                                                              | <a href="https://www.accessdata.fda.gov/drugsatfda_docs/label/2009/020839s0441bl.pdf">https://www.accessdata.fda.gov/drugsatfda_docs/label/2009/020839s0441bl.pdf</a>                                                                                                                                                                                       |      |
| 38. Prifitin® (rifapentine) Tablets                                                          | oral BCS2 1998-2                                                                                                                                                                                                                                                                                                                                            | 90s2 |
|                                                                                              | <a href="https://www.usp-pqm.org/sites/default/files/pqms/article/rifapentine-pir-jul2018.pdf">https://www.usp-pqm.org/sites/default/files/pqms/article/rifapentine-pir-jul2018.pdf</a>                                                                                                                                                                     |      |
| 39. Primaquine® (Primaquine Phosphate Tablets)                                               | oral BCS0 1952                                                                                                                                                                                                                                                                                                                                              | 50s0 |
| 40. Renagel® Tablets (sevelamer hydrochloride) 800mg Tablets                                 | oral BCS0 2000                                                                                                                                                                                                                                                                                                                                              | 00s0 |
| 41. Renvela® (sevelamer carbonate)                                                           | oral BCS0 2000-0                                                                                                                                                                                                                                                                                                                                            | 00s0 |
| 42. Rezurock® (belumosudil) tablets                                                          | oral BCS4                                                                                                                                                                                                                                                                                                                                                   |      |
| 43. Rifadin® IV (rifampin for injection, USP)                                                |                                                                                                                                                                                                                                                                                                                                                             |      |
| 44. Sarclisa® (isatuximab-irfc)                                                              |                                                                                                                                                                                                                                                                                                                                                             |      |
| 45. Soliqua® 100/33 (insulin glargine and lixisenatide) injection 100 Units/mL and 33 mcg/mL |                                                                                                                                                                                                                                                                                                                                                             |      |
| 46. Synvisc-One® (hylan G-F 20)                                                              |                                                                                                                                                                                                                                                                                                                                                             |      |
| 47. Synvisc® (hylan G-F 20)                                                                  |                                                                                                                                                                                                                                                                                                                                                             |      |
| 48. Taxotere® (docetaxel) Injection                                                          |                                                                                                                                                                                                                                                                                                                                                             |      |
| 49. Thymoglobulin® [Anti-thymocyte Globulin (Rabbit)]                                        |                                                                                                                                                                                                                                                                                                                                                             |      |
| 50. Thyrogen® (thyrotropin alfa)                                                             |                                                                                                                                                                                                                                                                                                                                                             |      |

51. Toujeo® (insulin glargine injection) 300 Units/mL
52. Xenpozyme™ (olipudase alfa-rpep)
53. Zaltrap® (ziv-aflibercept) Injection for Intravenous Infusion

**Merck products:**

<https://www.merck.com/products/>

products intended for use in the US only, excluding vaccines

1. ANTIVENIN™ (LATRODECTUS MACTANS)
- BCG Vaccine (For Percutaneous Use)
2. BELSOMRA® (suvorexant) tablets, for o use, C-IV  
**Oral BCS2 2014-2 10s2**  
[https://www.accessdata.fda.gov/drugsatfda\\_docs/nda/2014/204569Orig1s000ClinPharmR.pdf](https://www.accessdata.fda.gov/drugsatfda_docs/nda/2014/204569Orig1s000ClinPharmR.pdf)
3. BRIDION® (sugammadex) Injection, for intravenous use
4. CANCIDAS® (caspofungin acetate) for Injection, for intravenous use
5. CRIXIVAN® (INDINAVIR SULFATE) CAPSULES  
**Oral BCS0 1996 90s0**
6. CUBICIN® (daptomycin for injection) for Intravenous Use
7. CUBICIN® RF (daptomycin for injection), for intravenous use
8. DELSTRIGO™ (doravirine, lamivudine, and tenofovir disoproxil fumarate) tablets, for o use  
**Oral BCS0 2018-0 10s0**
9. DIFICID® (fidaxomicin) for O Suspension  
**Oral BCS4 2011-4 10s4**  
[https://www.accessdata.fda.gov/drugsatfda\\_docs/nda/2011/201699Orig1s000ClinPharmR.pdf](https://www.accessdata.fda.gov/drugsatfda_docs/nda/2011/201699Orig1s000ClinPharmR.pdf)
10. DIFICID® (fidaxomicin) tablets, for o use  
**Oral BCS4 2011-4 10s4**  
[https://www.accessdata.fda.gov/drugsatfda\\_docs/nda/2011/201699Orig1s000ClinPharmR.pdf](https://www.accessdata.fda.gov/drugsatfda_docs/nda/2011/201699Orig1s000ClinPharmR.pdf)
11. EMEND® (aprepitant) capsules (aprepitant) for ol suspension  
**Oral BCS2 BCS4 2003-4 00s4**  
[https://www.ema.europa.eu/en/documents/scientific-discussion/emend-epar-scientific-discussion\\_en.pdf](https://www.ema.europa.eu/en/documents/scientific-discussion/emend-epar-scientific-discussion_en.pdf)
12. EMEND® (fosaprepitant) for injection, for intravenous use
13. ENTEREG® (alvimopan) capsules, for o use  
**Oral BCS2 BCS4 2008-4 00s4**  
[https://www.accessdata.fda.gov/drugsatfda\\_docs/label/2008/021775lbl.pdf](https://www.accessdata.fda.gov/drugsatfda_docs/label/2008/021775lbl.pdf)
- ERVEBO® (Ebola Zaire Vaccine, Live) Suspension for intramuscular injection
14. FOLLISTIM® AQ Cartridge (follitropin beta injection) for subcutaneous use
- GARDASIL® [Human Papillomavirus Quadrivalent (Types 6, 11, 16 and 18) Vaccine, Recombinant]
- GARDASIL®9 (Human Papillomavirus 9-valent Vaccine, Recombinant) Suspension for intramuscular injection
15. INTRON® A (interferon alfa-2b, recombinant For Injection)
16. INVANZ® (ertapenem for injection) for intravenous (IV) or intramuscular (IM) use
17. ISENTRESS® (raltegravir) chewable tablets, for o use  
**Oral BCS2 2007-2 00s2**

[https://www.ema.europa.eu/en/documents/scientific-discussion/isentress-epar-scientific-discussion\\_en.pdf](https://www.ema.europa.eu/en/documents/scientific-discussion/isentress-epar-scientific-discussion_en.pdf)

18. ISENTRESS® (raltegravir) film-coated tablets, for o use  
**Oral BCS2** **2007-2** **00s2**  
[https://www.ema.europa.eu/en/documents/scientific-discussion/isentress-epar-scientific-discussion\\_en.pdf](https://www.ema.europa.eu/en/documents/scientific-discussion/isentress-epar-scientific-discussion_en.pdf)
  19. ISENTRESS® (raltegravir) for o suspension  
**Oral BCS2** **2007-2** **00s2**  
[https://www.ema.europa.eu/en/documents/scientific-discussion/isentress-epar-scientific-discussion\\_en.pdf](https://www.ema.europa.eu/en/documents/scientific-discussion/isentress-epar-scientific-discussion_en.pdf)
  20. ISENTRESS® HD (raltegravir) film-coated tablets, for o use  
**Oral BCS2** **2007-2** **00s2**  
[https://www.ema.europa.eu/en/documents/scientific-discussion/isentress-epar-scientific-discussion\\_en.pdf](https://www.ema.europa.eu/en/documents/scientific-discussion/isentress-epar-scientific-discussion_en.pdf)
  21. JANUMET® (sitagliptin and metformin hydrochloride) tablets, for o use  
**Oral BCS3** **2007-3** **00s3**  
[doi.org/10.1016/j.xphs.2021.01.011](https://doi.org/10.1016/j.xphs.2021.01.011)  
[https://www.ema.europa.eu/en/documents/scientific-guideline/sitagliptin-film-coated-tablets-25-50-100-mg-product-specific-bioequivalence-guidance\\_en.pdf](https://www.ema.europa.eu/en/documents/scientific-guideline/sitagliptin-film-coated-tablets-25-50-100-mg-product-specific-bioequivalence-guidance_en.pdf)
  22. JANUMET® XR (sitagliptin and metformin hydrochloride extended-release) tablets, for o use  
**Oral BCS3** **2012-3** **10s3**  
[doi.org/10.1016/j.xphs.2021.01.011](https://doi.org/10.1016/j.xphs.2021.01.011)  
[https://www.ema.europa.eu/en/documents/scientific-guideline/sitagliptin-film-coated-tablets-25-50-100-mg-product-specific-bioequivalence-guidance\\_en.pdf](https://www.ema.europa.eu/en/documents/scientific-guideline/sitagliptin-film-coated-tablets-25-50-100-mg-product-specific-bioequivalence-guidance_en.pdf)
  23. JANUVIA® (sitagliptin) tablets, for o use  
**Oral BCS1** **2006-1** **00s1**  
[https://www.ema.europa.eu/en/documents/scientific-guideline/sitagliptin-film-coated-tablets-25-50-100-mg-product-specific-bioequivalence-guidance\\_en.pdf](https://www.ema.europa.eu/en/documents/scientific-guideline/sitagliptin-film-coated-tablets-25-50-100-mg-product-specific-bioequivalence-guidance_en.pdf)
  24. KEYTRUDA® (pembrolizumab) injection, for intravenous use  
**M-M-R® II [MEASLES, MUMPS, and RUBELLA VIRUS VACCINE LIVE]**
  25. NOXAFIL® (posaconazole) injection, for intravenous use, delayed-release tablets, for o use, and o suspension  
**Oral BCS2** **2006-2** **00s2**  
[https://www.ema.europa.eu/en/documents/scientific-guideline/draft-posaconazole-product-specific-bioequivalence-guidance\\_en.pdf](https://www.ema.europa.eu/en/documents/scientific-guideline/draft-posaconazole-product-specific-bioequivalence-guidance_en.pdf)
- Liquid Pedvax HIB® [Haemophilus b Conjugate Vaccine (Meningococcal Protein Conjugate)]**
26. PIFELTRO™ (doravirine) tablets, for o use  
**Oral BCS2** **2018-2** **10s2**  
[https://www.accessdata.fda.gov/drugsatfda\\_docs/nda/2018/210806Orig1s000,%20210807Orig1s000ChemR.pdf](https://www.accessdata.fda.gov/drugsatfda_docs/nda/2018/210806Orig1s000,%20210807Orig1s000ChemR.pdf)
- PNEUMOVAX® 23 [pneumococcal vaccine polyvalent] Sterile, Liquid Vaccine for Intramuscular or Subcutaneous Injection**
27. Pregnyl® (chorionic gonadotropin for injection, USP)
  28. PREVYMIS™ (letermovir) injection, for intravenous use
  29. PREVYMIS™ (letermovir) tablets, for o use  
**Oral BCS2** **2017-2** **10s2**

[https://www.ema.europa.eu/en/documents/assessment-report/prevymis-epar-public-assessment-report\\_en.pdf](https://www.ema.europa.eu/en/documents/assessment-report/prevymis-epar-public-assessment-report_en.pdf)

30. PRIMAXIN® I.V. (imipenem and cilastatin) for Injection, for intravenous use  
**ProQuad® [Measles, Mumps, Rubella and Varicella Virus Vaccine Live] Lyophilized preparation for subcutaneous injection**
31. PROVENTIL® HFA (albuterol sulfate) Inhalation Aerosol
32. RECARBRIO™ (imipenem, cilastatin, and relebactam) for injection, for intravenous use  
**RECOMBIVAX HB® [HEPATITIS B VACCINE (RECOMBINANT)]**  
**RotaTeq® [Rotavirus Vaccine, Live, O, Pentavalent] O Solution**
33. SEGLUROMET™ (ertugliflozin and metformin) tablets, for o use  
**Oral BCS3** **2017-3** **10s3**  
[https://www.ema.europa.eu/en/documents/assessment-report/steglatro-epar-public-assessment-report\\_en.pdf](https://www.ema.europa.eu/en/documents/assessment-report/steglatro-epar-public-assessment-report_en.pdf)  
[doi.org/10.1016/j.xphs.2021.01.011](https://doi.org/10.1016/j.xphs.2021.01.011)
34. SIVEXTRO® (tedizolid phosphate) for injection, for intravenous use
35. SIVEXTRO® (tedizolid phosphate) tablet, for o use  
**Oral BCS0** **2014-0** **10s0**
36. STEGLATRO™ (ertugliflozin) tablets, for o use  
**Oral BCS1** **2017-1** **10s1**  
[https://www.ema.europa.eu/en/documents/assessment-report/steglatro-epar-public-assessment-report\\_en.pdf](https://www.ema.europa.eu/en/documents/assessment-report/steglatro-epar-public-assessment-report_en.pdf)
37. STEGLUJAN™ (ertugliflozin and sitagliptin) tablets, for o use  
**Oral BCS1** **2017-1** **10s1**  
[https://www.ema.europa.eu/en/documents/assessment-report/steglatro-epar-public-assessment-report\\_en.pdf](https://www.ema.europa.eu/en/documents/assessment-report/steglatro-epar-public-assessment-report_en.pdf)  
[https://www.ema.europa.eu/en/documents/scientific-guideline/sitagliptin-film-coated-tablets-25-50-100-mg-product-specific-bioequivalence-guidance\\_en.pdf](https://www.ema.europa.eu/en/documents/scientific-guideline/sitagliptin-film-coated-tablets-25-50-100-mg-product-specific-bioequivalence-guidance_en.pdf)
38. STROMECTOL® (IVERMECTIN) TABLETS  
**Oral BCS2 BCS4** **1996** **90s4**  
[https://www.accessdata.fda.gov/drugsatfda\\_docs/label/2008/050742s0221bl.pdf](https://www.accessdata.fda.gov/drugsatfda_docs/label/2008/050742s0221bl.pdf)  
[https://extranet.who.int/pqweb/sites/default/files/documents/21%20BE%20ivermectin\\_Apr2019.pdf](https://extranet.who.int/pqweb/sites/default/files/documents/21%20BE%20ivermectin_Apr2019.pdf)
39. TEMODAR® (temozolomide) Capsules  
**Oral BCS1** **1999** **90s1**  
[https://www.ema.europa.eu/en/documents/assessment-report/temozolomide-hospira-epar-public-assessment-report\\_en.pdf](https://www.ema.europa.eu/en/documents/assessment-report/temozolomide-hospira-epar-public-assessment-report_en.pdf)
40. TEMODAR® (temozolomide) for Injection  
**TICE® BCG BCG LIVE (FOR INTRAVESICAL USE)**
41. TRUSOPT® (dorzolamide hydrochloride ophthalmic solution) Sterile Ophthalmic Solution 2%
- VAQTA® [Hepatitis A Vaccine, Inactivated]**  
**VARIVAX® [Varicella Virus Vaccine Live]**  
**VAXELIS™ (Diphtheria and Tetanus Toxoids and Acellular Pertussis, Inactivated Poliovirus, Haemophilus b Conjugate and Hepatitis B Vaccine)**  
**VAXNEUVANCE™ (Pneumococcal 15 valent Conjugate Vaccine) Suspension for Intramuscular Injection**

42. VERQUVO™ (vericiguat) tablets, for o use  
**Oral BCS2**                                  **2021-2**                                  **20s2**  
[https://www.ema.europa.eu/en/documents/assessment-report/verquvo-epar-public-assessment-report\\_en.pdf](https://www.ema.europa.eu/en/documents/assessment-report/verquvo-epar-public-assessment-report_en.pdf)
43. WELIREG™ (belzutifan) tablets, for o use  
**Oral BCS2**                                  **2021**                                  **20s2**  
[https://www.accessdata.fda.gov/drugsatfda\\_docs/nda/2021/215383Orig1s000ChemR.pdf](https://www.accessdata.fda.gov/drugsatfda_docs/nda/2021/215383Orig1s000ChemR.pdf)
44. ZEPATIER® (elbasvir and grazoprevir) tablets, for o use  
**Oral BCS4 BCS2**                                  **2016-4**                                  **10s4**  
[https://www.accessdata.fda.gov/drugsatfda\\_docs/nda/2016/208261Orig1s000ClinPharmR.pdf](https://www.accessdata.fda.gov/drugsatfda_docs/nda/2016/208261Orig1s000ClinPharmR.pdf)
45. ZERBAXA™ (ceftolozane and tazobactam) for injection, for intravenous use
46. ZINPLAVA™ (bezlotoxumab) injection, for intravenous use
47. ZOLINZA® (vorinostat capsules, for o use)  
**Oral BCS4**                                  **2006-4**                                  **00s4**  
[https://www.accessdata.fda.gov/drugsatfda\\_docs/nda/2006/021991s000\\_Zolinza\\_ClinPharmR.pdf](https://www.accessdata.fda.gov/drugsatfda_docs/nda/2006/021991s000_Zolinza_ClinPharmR.pdf)

## Roche products:

Roche products Worldwide

<https://www.roche.com/solutions/pharma/#67916b85-0b8d-44de-b762-70a48cccef3c>

- |                                                                                                                                                                                                                                                                                                   |                                  |                           |                       |               |             |
|---------------------------------------------------------------------------------------------------------------------------------------------------------------------------------------------------------------------------------------------------------------------------------------------------|----------------------------------|---------------------------|-----------------------|---------------|-------------|
| 1.                                                                                                                                                                                                                                                                                                | Actemra/RoActemra                | tocilizumab               |                       |               |             |
| 2.                                                                                                                                                                                                                                                                                                | Alecensa                         | alectinib                 | <b>Oral BCS2 BCS4</b> | <b>2015-4</b> | <b>10s4</b> |
| <a href="https://www.ema.europa.eu/en/documents/scientific-guideline/alectinib-hard-capsule-150-mg-product-specific-bioequivalence-guidance_en.pdf">https://www.ema.europa.eu/en/documents/scientific-guideline/alectinib-hard-capsule-150-mg-product-specific-bioequivalence-guidance_en.pdf</a> |                                  |                           |                       |               |             |
| 3.                                                                                                                                                                                                                                                                                                | Avastin                          | bevacizumab               |                       |               |             |
| 4.                                                                                                                                                                                                                                                                                                | CellCept                         | mycophenolate mofetil     | <b>Oral BCS2 BCS4</b> | <b>1995</b>   | <b>90s4</b> |
| 5.                                                                                                                                                                                                                                                                                                | Copegus                          | ribavarin                 | <b>Oral BCS3</b>      | <b>2002-3</b> | <b>00s3</b> |
| <a href="https://extranet.who.int/pqweb/sites/default/files/documents/BE_Ribavirin_September2021.pdf">https://extranet.who.int/pqweb/sites/default/files/documents/BE_Ribavirin_September2021.pdf</a>                                                                                             |                                  |                           |                       |               |             |
| 6.                                                                                                                                                                                                                                                                                                | Cotellic                         | cobimetinib               | <b>Oral BCS3</b>      | <b>2015-3</b> | <b>10s3</b> |
| <a href="https://www.ema.europa.eu/en/documents/assessment-report/cotellic-epar-public-assessment-report_en.pdf">https://www.ema.europa.eu/en/documents/assessment-report/cotellic-epar-public-assessment-report_en.pdf</a>                                                                       |                                  |                           |                       |               |             |
| 7.                                                                                                                                                                                                                                                                                                | Enspryng                         | satralizumab              |                       |               |             |
| 8.                                                                                                                                                                                                                                                                                                | Erivedge                         | vismodegib                | <b>Oral BCS2</b>      | <b>2012-2</b> | <b>10s2</b> |
| <a href="https://www.ema.europa.eu/en/documents/assessment-report/erivedge-epar-public-assessment-report_en.pdf">https://www.ema.europa.eu/en/documents/assessment-report/erivedge-epar-public-assessment-report_en.pdf</a>                                                                       |                                  |                           |                       |               |             |
| 9.                                                                                                                                                                                                                                                                                                | Esbriet                          | pirfenidone               | <b>Oral BCS1</b>      | <b>2014-1</b> | <b>10s1</b> |
| <a href="https://www.accessdata.fda.gov/drugsatfda_docs/nda/2014/022535Orig1s000ClinPharmR.pdf">https://www.accessdata.fda.gov/drugsatfda_docs/nda/2014/022535Orig1s000ClinPharmR.pdf</a>                                                                                                         |                                  |                           |                       |               |             |
| 10.                                                                                                                                                                                                                                                                                               | Evrysdi                          | risdiplam                 | <b>Oral BCS0</b>      | <b>2020-0</b> | <b>20s0</b> |
| 11.                                                                                                                                                                                                                                                                                               | Fuzeon                           | enfuvirtide               |                       |               |             |
| 12.                                                                                                                                                                                                                                                                                               | Gazyva/Gazyvaro                  | obinutuzumab              |                       |               |             |
| 13.                                                                                                                                                                                                                                                                                               | Hemlibra                         | emicizumab                |                       |               |             |
| 14.                                                                                                                                                                                                                                                                                               | Herceptin                        | trastuzumab               |                       |               |             |
| 15.                                                                                                                                                                                                                                                                                               | Herceptin SC / Herceptin Hylecta | trastuzumab hyaluronidase |                       |               |             |

|                                                                                       |                                                                                                                                                                                                                                                                                                                                                                                                   |                       |               |             |
|---------------------------------------------------------------------------------------|---------------------------------------------------------------------------------------------------------------------------------------------------------------------------------------------------------------------------------------------------------------------------------------------------------------------------------------------------------------------------------------------------|-----------------------|---------------|-------------|
| 16. Kadcyła                                                                           | trastuzumab emtansine                                                                                                                                                                                                                                                                                                                                                                             |                       |               |             |
| 17. MabThera / Rituxan                                                                | rituximab                                                                                                                                                                                                                                                                                                                                                                                         |                       |               |             |
| 18. MabThera SC / Rituxan Hycela                                                      | rituximab hyaluronidase                                                                                                                                                                                                                                                                                                                                                                           |                       |               |             |
| 19. Madopar                                                                           | levodopa benserazide                                                                                                                                                                                                                                                                                                                                                                              | <b>Oral BCS1</b>      |               |             |
|                                                                                       | <a href="https://www.accessdata.fda.gov/drugsatfda_docs/nda/2015/203312Orig1s000ClinPharmR.pdf">https://www.accessdata.fda.gov/drugsatfda_docs/nda/2015/203312Orig1s000ClinPharmR.pdf</a>                                                                                                                                                                                                         |                       |               |             |
| 20. Mircera                                                                           | methoxy polyethylene glycol epoetin beta                                                                                                                                                                                                                                                                                                                                                          |                       |               |             |
| 21. NeoRecormon                                                                       | epoetin beta                                                                                                                                                                                                                                                                                                                                                                                      |                       |               |             |
| 22. Ocrevus                                                                           | ocrelizumab                                                                                                                                                                                                                                                                                                                                                                                       |                       |               |             |
| 23. Pegasys                                                                           | peginterferon $\alpha$                                                                                                                                                                                                                                                                                                                                                                            |                       |               |             |
| 24. Perjeta                                                                           | pertuzumab                                                                                                                                                                                                                                                                                                                                                                                        |                       |               |             |
| 25. Phesgo                                                                            | pertuzumab trastuzumab hyaluronidase                                                                                                                                                                                                                                                                                                                                                              |                       |               |             |
| 26. Polivy                                                                            | polatuzumab vedotin                                                                                                                                                                                                                                                                                                                                                                               |                       |               |             |
| 27. Pulmozyme                                                                         | dornase alfa                                                                                                                                                                                                                                                                                                                                                                                      |                       |               |             |
| 28. Roaccutane/Accutane                                                               | isotretinoin                                                                                                                                                                                                                                                                                                                                                                                      | <b>Oral BCS2</b>      | <b>1982</b>   | <b>80s2</b> |
|                                                                                       | <a href="https://www.accessdata.fda.gov/drugsatfda_docs/nda/2019/211913Orig1s000ChemR.pdf">https://www.accessdata.fda.gov/drugsatfda_docs/nda/2019/211913Orig1s000ChemR.pdf</a>                                                                                                                                                                                                                   |                       |               |             |
| 29. Rocephin                                                                          | ceftriaxone                                                                                                                                                                                                                                                                                                                                                                                       |                       |               |             |
| 30. Ronapreve                                                                         | casirivimab and imdevimab                                                                                                                                                                                                                                                                                                                                                                         |                       |               |             |
| 31. Rozlytrek                                                                         | entrectinib                                                                                                                                                                                                                                                                                                                                                                                       | <b>Oral BCS2</b>      | <b>2019-2</b> | <b>10s2</b> |
|                                                                                       | <a href="https://www.accessdata.fda.gov/drugsatfda_docs/nda/2019/212725Orig1s000.%20212726Orig1s000ChemR.pdf">https://www.accessdata.fda.gov/drugsatfda_docs/nda/2019/212725Orig1s000.%20212726Orig1s000ChemR.pdf</a>                                                                                                                                                                             |                       |               |             |
| 32. Susvimo (ranibizumab injection) 100 mg/mL for intravitreal use via ocular implant |                                                                                                                                                                                                                                                                                                                                                                                                   |                       |               |             |
| 33. Tamiflu                                                                           | oseltamivir                                                                                                                                                                                                                                                                                                                                                                                       | <b>Oral BCS3</b>      | <b>1999</b>   | <b>90s3</b> |
|                                                                                       | <a href="https://www.ema.europa.eu/en/documents/scientific-guideline/oseltamivir-hard-capsules-30-45-75-mg-powder-oral-suspension-6-mg/ml-12-mg/ml-product-specific-bioequivalence-guidance_en.pdf">https://www.ema.europa.eu/en/documents/scientific-guideline/oseltamivir-hard-capsules-30-45-75-mg-powder-oral-suspension-6-mg/ml-12-mg/ml-product-specific-bioequivalence-guidance_en.pdf</a> |                       |               |             |
| 34. Tarceva                                                                           | erlotinib                                                                                                                                                                                                                                                                                                                                                                                         | <b>Oral BCS2</b>      | <b>2004-2</b> | <b>00s2</b> |
|                                                                                       | <a href="https://www.fda.gov/files/drugs/published/N21-743S021-Erlotinib-Clinpharm-BPCA.pdf">https://www.fda.gov/files/drugs/published/N21-743S021-Erlotinib-Clinpharm-BPCA.pdf</a>                                                                                                                                                                                                               |                       |               |             |
| 35. Tecentriq                                                                         | atezolizumab                                                                                                                                                                                                                                                                                                                                                                                      |                       |               |             |
| 36. Vabysmo                                                                           | faricimab                                                                                                                                                                                                                                                                                                                                                                                         |                       |               |             |
| 37. Valcyte                                                                           | valganciclovir                                                                                                                                                                                                                                                                                                                                                                                    | <b>Oral BCS1</b>      | <b>2001-1</b> | <b>00s1</b> |
|                                                                                       | <a href="https://www.accessdata.fda.gov/drugsatfda_docs/label/2003/21304se1-001_valcyte_lbl.pdf">https://www.accessdata.fda.gov/drugsatfda_docs/label/2003/21304se1-001_valcyte_lbl.pdf</a>                                                                                                                                                                                                       |                       |               |             |
| 38. Xeloda                                                                            | capecitabine                                                                                                                                                                                                                                                                                                                                                                                      | <b>Oral BCS0</b>      | <b>1998</b>   | <b>90s0</b> |
| 39. Xofluza                                                                           | baloxavir marboxil                                                                                                                                                                                                                                                                                                                                                                                | <b>Oral BCS2 BCS4</b> | <b>2018-4</b> | <b>10s4</b> |
| 40. Zelboraf                                                                          | vemurafenib                                                                                                                                                                                                                                                                                                                                                                                       | <b>Oral BCS4</b>      | <b>2011-4</b> | <b>10s4</b> |
|                                                                                       | <a href="https://www.accessdata.fda.gov/drugsatfda_docs/nda/2011/202429Orig1s000ClinPharmR.pdf">https://www.accessdata.fda.gov/drugsatfda_docs/nda/2011/202429Orig1s000ClinPharmR.pdf</a>                                                                                                                                                                                                         |                       |               |             |

### AstraZeneca products

(<https://www.astrazeneca.com/our-therapy-areas/medicines.html>):

1. Arimidex® (anastrozole) **GB** - oral BCS0 1995 90s0
2. Bambec® (bambuterol) **GB** oral BCS0
3. Bevespi® (glycopyrronium / formoterol fumarate dihydrate) **GB**
4. Bricanyl® (terbutaline sulphate) **GB** (also) oral BCS0 1974 70s0

5. *Brilique® (ticagrelor)* [GB / NI oral BCS4](#) 2011-4 10s4  
[https://www.ema.europa.eu/en/documents/scientific-guideline/ticagrelor-film-coated-tablets-90mg-product-specific-bioequivalence-guidance\\_en.pdf](https://www.ema.europa.eu/en/documents/scientific-guideline/ticagrelor-film-coated-tablets-90mg-product-specific-bioequivalence-guidance_en.pdf)
6. *Bydureon® (exenatide)* [GB / NI](#)
7. *Byetta® (exenatide)* [GB / NI](#)
8. *Calquence®▼ (acalabrutinib)* [GB / NI oral BCS2](#) 2017-2 10s2  
[https://www.accessdata.fda.gov/drugsatfda\\_docs/nda/2017/210259Orig1s000ChemR.pdf](https://www.accessdata.fda.gov/drugsatfda_docs/nda/2017/210259Orig1s000ChemR.pdf)
9. *Casodex® (bicalutamide)* [GB oral BCS2](#) 1995 90s2  
[https://www.accessdata.fda.gov/drugsatfda\\_docs/label/2006/020498s018lbl.pdf](https://www.accessdata.fda.gov/drugsatfda_docs/label/2006/020498s018lbl.pdf)
10. *Crestor® (rosuvastatin)* [GB oral BCS0](#) 2003-0 00s0
11. *Daxas®▼ (roflumilast)* [GB oral BCS2](#) 2011-2 10s2  
[https://www.accessdata.fda.gov/drugsatfda\\_docs/nda/2011/022522Orig1s000ChemR.pdf](https://www.accessdata.fda.gov/drugsatfda_docs/nda/2011/022522Orig1s000ChemR.pdf)
12. *Duaklir®▼ Genuair (aclidinium/formoterol)* [GB](#)
13. *Eklira®▼ Genuair (aclidinium/bromide)* [GB](#)
14. *Fasenra®▼ (benralizumab)* [GB / NI](#)
15. *Faslodex® (fulvestrant)* [GB / NI](#)
16. *Fluenz Tetra® (live attenuated, nasal)* [GB / NI](#)
17. *Forxiga® (dapagliflozin)* [GB / NI oral BCS3](#) 2014-3 10s3  
[https://www.ema.europa.eu/en/documents/assessment-report/forxiga-epar-public-assessment-report\\_en.pdf](https://www.ema.europa.eu/en/documents/assessment-report/forxiga-epar-public-assessment-report_en.pdf)
18. *IMFINZI®▼ (durvalumab)* [GB / NI](#)
19. *Iressa® (gefitinib)* [GB / NI oral BCS2 BCS4](#) 2003-4 00s4  
[https://www.ema.europa.eu/en/documents/scientific-guideline/draft-gefitinib-film-coated-tablet-250-mg-product-specific-bioequivalence-guidance\\_en.pdf](https://www.ema.europa.eu/en/documents/scientific-guideline/draft-gefitinib-film-coated-tablet-250-mg-product-specific-bioequivalence-guidance_en.pdf)
20. *Komboglyze® (saxagliptin/metformin hydrochloride)* [GB / NI oral BCS3](#) 2010-3 10s3  
[https://www.ema.europa.eu/en/documents/assessment-report/onglyza-epar-public-assessment-report\\_en.pdf](https://www.ema.europa.eu/en/documents/assessment-report/onglyza-epar-public-assessment-report_en.pdf)  
[https://www.ema.europa.eu/en/documents/assessment-report/vildagliptin/metformin-hydrochloride-accord-epar-public-assessment-report\\_en.pdf](https://www.ema.europa.eu/en/documents/assessment-report/vildagliptin/metformin-hydrochloride-accord-epar-public-assessment-report_en.pdf)
21. *Kosehugo®▼ (selumetinib)* [GB oral BCS4](#) 2020-4 20s4  
[https://www.accessdata.fda.gov/drugsatfda\\_docs/nda/2020/213756Orig1s000ChemR.pdf](https://www.accessdata.fda.gov/drugsatfda_docs/nda/2020/213756Orig1s000ChemR.pdf)
22. *Lokelma®▼ (sodium zirconium cyclosilicate)* [GB / NI oral BCS0](#) 2018-0 10s0
23. *Nexium® (esomeprazole)* [GB oral BCS0](#) 2001-0 00s0
24. *Onglyza® (saxagliptin)* [GB / NI oral BCS3](#) 2009-3 00s3  
[https://www.ema.europa.eu/en/documents/assessment-report/onglyza-epar-public-assessment-report\\_en.pdf](https://www.ema.europa.eu/en/documents/assessment-report/onglyza-epar-public-assessment-report_en.pdf)
25. *Oxis® Turbohaler (formoterol)* [GB](#)
26. *Lynparza® (olaparib)* [GB / NI oral BCS4](#) 2014-4 10s4  
[https://www.ema.europa.eu/en/documents/variation-report/lynparza-h-c-3726-x-0016-g-epar-assessment-report-extension\\_en.pdf](https://www.ema.europa.eu/en/documents/variation-report/lynparza-h-c-3726-x-0016-g-epar-assessment-report-extension_en.pdf)
27. *Pulmicort® (budesonide)* [GB](#)
28. *Qtern® (dapagliflozin/saxagliptin)* [GB / NI oral BCS3](#) 2017-3 10s3  
[https://www.ema.europa.eu/en/documents/assessment-report/onglyza-epar-public-assessment-report\\_en.pdf](https://www.ema.europa.eu/en/documents/assessment-report/onglyza-epar-public-assessment-report_en.pdf)  
[https://www.ema.europa.eu/en/documents/assessment-report/forxiga-epar-public-assessment-report\\_en.pdf](https://www.ema.europa.eu/en/documents/assessment-report/forxiga-epar-public-assessment-report_en.pdf)
29. *Symbicort® (budesonide/formoterol)* [GB](#)
30. *Synagis® (palivizumab)* [GB / NI](#)



31. TAGRISSO®▼ (osimertinib) *GB / NI* oral BCS3 2015-3 10s3  
[https://www.ema.europa.eu/en/documents/assessment-report/tagrisso-epar-public-assessment-report\\_en.pdf](https://www.ema.europa.eu/en/documents/assessment-report/tagrisso-epar-public-assessment-report_en.pdf)
32. Trixeo® (budesonide, formoterol fumarate dihydrate, glycopyrronium) *GB*
33. Xigduo® (dapagliflozin/metformin) *GB / NI* oral BCS3 2014-3 10s3  
[https://www.ema.europa.eu/en/documents/assessment-report/forxiga-epar-public-assessment-report\\_en.pdf](https://www.ema.europa.eu/en/documents/assessment-report/forxiga-epar-public-assessment-report_en.pdf)  
[https://www.ema.europa.eu/en/documents/assessment-report/vildagliptin/metformin-hydrochloride-accord-epar-public-assessment-report\\_en.pdf](https://www.ema.europa.eu/en/documents/assessment-report/vildagliptin/metformin-hydrochloride-accord-epar-public-assessment-report_en.pdf)
34. Zoladex® (goserelin) *GB*

### Bristol Myers Squibb products:

Products on the US market.

<https://www.bms.com/patient-and-caregivers/our-medicines.html>

1. ABECMA® (idecabtagene vicleucel)
2. ABRAXANE® (paclitaxel protein-bound particles for injectable suspension) (albumin-bound)
3. AZACTAM® (aztreonam for injection, USP)
4. BREYANZI® (lisocabtagene maraleucel)
5. BARACLUDGE® (entecavir) *oral BCS3* 2005-3 00s3  
<https://www.genesmiddeleninformatiebank.nl/pars/h119701.pdf>
6. CAMZYOS™ (mavacamten) *oral BCS2* 2022-2 20s2  
[https://www.accessdata.fda.gov/drugsatfda\\_docs/label/2022/214998s000lbl.pdf](https://www.accessdata.fda.gov/drugsatfda_docs/label/2022/214998s000lbl.pdf)
7. DROXIA® (hydroxyurea) *oral BCS0* 1967 60s0
8. ELIQUIS® (apixaban) *oral BCS3* 2012-3 10s3  
[https://www.accessdata.fda.gov/drugsatfda\\_docs/nda/2012/202155Orig1s000ClinPharmR.pdf](https://www.accessdata.fda.gov/drugsatfda_docs/nda/2012/202155Orig1s000ClinPharmR.pdf)
9. EMLICITI® (elotuzumab)
10. EVOTAZ® (atazanavir and cobicistat) *oral BCS2* 2015-2 10s2  
[https://www.ema.europa.eu/en/documents/assessment-report/atazanavir-mylan-epar-public-assessment-report\\_en.pdf](https://www.ema.europa.eu/en/documents/assessment-report/atazanavir-mylan-epar-public-assessment-report_en.pdf)  
[https://www.accessdata.fda.gov/drugsatfda\\_docs/nda/2014/203094Orig1Orig2s000ClinPharmR.pdf](https://www.accessdata.fda.gov/drugsatfda_docs/nda/2014/203094Orig1Orig2s000ClinPharmR.pdf)
11. HYDREA® (hydroxyurea) *oral BCS0* 1967 60s0
12. IDHIFA® (enasidenib) *oral BCS2* 2017-2 20s2
13. INREBIC® (fedratinib) *oral BCS0* 2019-0 10s0
14. ISTODAX® (romidepsin)
15. KENALOG®-10 (triamcinolone acetonide)
16. KENALOG®-40 (triamcinolone acetonide) and KENALOG®-80 (triamcinolone acetonide)
17. NULOJIX® (belatacept)
18. ONUREG® (azacitidine tablets) *oral BCS3* 2004-3 00s3  
[https://www.accessdata.fda.gov/drugsatfda\\_docs/nda/2020/214120Orig1s000ChemR.pdf](https://www.accessdata.fda.gov/drugsatfda_docs/nda/2020/214120Orig1s000ChemR.pdf)
19. OPDIVO® (nivolumab)
20. OPDUALAG™ (nivolumab and relatlimab-rmbw)
21. ORENCIA® (abatacept)

22. POMALYST<sup>®</sup> (pomalidomide) **oral BCS4** 2013-4 10s4
23. REBLOZYL<sup>®</sup> (luspatercept-aamt)
24. REVLIMID<sup>®</sup> (lenalidomide) **oral BCS3** 2005-3 00s3  
[https://www.accessdata.fda.gov/drugsatfda\\_docs/nda/2005/021880s000\\_Revlimid\\_BioPharmR.pdf](https://www.accessdata.fda.gov/drugsatfda_docs/nda/2005/021880s000_Revlimid_BioPharmR.pdf)
25. REYATAZ<sup>®</sup> (atazanavir) **oral BCS2** 2003-2 00s2  
[https://www.ema.europa.eu/en/documents/assessment-report/atazanavir-mylan-epar-public-assessment-report\\_en.pdf](https://www.ema.europa.eu/en/documents/assessment-report/atazanavir-mylan-epar-public-assessment-report_en.pdf)
26. SOTYKTU<sup>™</sup> (deucravacitinib) **oral BCS0** 2022-0 20s0
27. SPRYCEL<sup>®</sup> (dasatinib) **oral BCS2** 2006-2 00s2  
[https://www.accessdata.fda.gov/drugsatfda\\_docs/nda/2006/021986s000\\_Sprycel\\_ChemR.pdf](https://www.accessdata.fda.gov/drugsatfda_docs/nda/2006/021986s000_Sprycel_ChemR.pdf)
28. SUSTIVA<sup>®</sup> (efavirenz) **oral BCS2** 1998 90s2  
[https://www.ema.europa.eu/en/documents/assessment-report/efavirenz/emtricitabine/tenofovir-disoproxil-krka-epar-public-assessment-report\\_en.pdf](https://www.ema.europa.eu/en/documents/assessment-report/efavirenz/emtricitabine/tenofovir-disoproxil-krka-epar-public-assessment-report_en.pdf)
29. THALOMID<sup>®</sup> (thalidomide) **oral BCS2 BCS4** 1998 90s4  
[https://www.ema.europa.eu/en/documents/assessment-report/thalidomide-lipomed-epar-public-assessment-report\\_en.pdf](https://www.ema.europa.eu/en/documents/assessment-report/thalidomide-lipomed-epar-public-assessment-report_en.pdf)
30. VIDAZA<sup>®</sup> (azacitidine)
31. YERVOY<sup>®</sup> (ipilimumab)
32. ZEPOSIA<sup>®</sup> (ozanimod) **oral BCS0** 2020-0 20s0
